# Supplementary material
Source: PubMed Central journal article supplement (PMC4423559)
Supplement: NIHMS682288-supplement-Supporting_Information.pdf [file NIHMS682288-supplement-Supporting_Information.pdf]

## SUPPLEMENTARY INFORMATION

### Experimental Section

**Protein expression, purification and sample preparation.** Yeast GGC (residues 1-300) with C-terminal His-tag (Leu-Glu-His<sub>6</sub>) was expressed using a pET-21 vector in *E. coli* BL21(DE3) cells in M9 minimal medium supplemented with 1 g l<sup>-1</sup> <sup>15</sup>NH<sub>4</sub>Cl, 2 g l<sup>-1</sup> <sup>2</sup>H-<sup>13</sup>C-D-glucose and 98.85% D<sub>2</sub>O at 37 °C. Expression was induced by the addition of 0.5 mM isopropyl b-D-thiogalactopyranoside (IPTG) at an OD<sub>600</sub> of 0.6 and lasted for 4 h. Cells were harvested by centrifugation at 6,000 g for 30 min and resuspended in 20 mM HEPES buffer (pH 7.5), 150 mM NaCl, and 5 mM mercaptoethanol (BME). The cells were lysed by sonication in the resuspension buffer containing phenylmethylsulfonyl fluoride (PMSF), followed by pelleting inclusion bodies by centrifugation at 40,000 g for 30 min at 4 °C. The GGC-containing inclusion bodies were solubilised in the same buffer with 3 M Guanidinium HCl and 1% of Triton X-100. GGC was purified by Ni-NTA chromatography, and subsequently refolded on column by exchanging the denaturing buffer with buffer containing 3 mM dodecylphosphocholine (DPC) detergent micelles. The refolded protein was then passed through the Superdex-200 (GE healthcare) size exclusion column and eluted as monomers at M.W. ~75 kDa, which is consistent with 34 kDa GGC plus ~40 kDa DPC micelle. Typical NMR sample consists of 0.5 – 1 mM GGC, 50 mM MES (pH 6.0), 2 mM BME, and 80-120 mM DPC.

**NMR resonance assignment.** NMR spectra were recorded at 30 °C on 600 MHz spectrometer equipped with cryogenic TXI probe (Bruker) using a sample with 0.9 mM U-[<sup>15</sup>N, <sup>13</sup>C, <sup>2</sup>H]-GGC. Sequence-specific assignment of backbone <sup>1</sup>H<sup>N</sup>, <sup>15</sup>N, <sup>13</sup>C<sup>α</sup>, <sup>13</sup>C<sup>β</sup> and <sup>13</sup>C<sup>γ</sup> chemical shifts was accomplished using the TROSY versions of HNCA, HN(CO)CA, HNCACB, HN(CO)CACB, HN(CA)CO and HNCO.<sup>[1]</sup> In addition, a 3D (<sup>1</sup>H<sup>N</sup>,<sup>1</sup>H<sup>N</sup>)-HMQC-NOESY-TROSY with <sup>15</sup>N, <sup>15</sup>N and <sup>1</sup>H<sup>N</sup> evolution in the *t*<sub>1</sub>, *t*<sub>2</sub> and *t*<sub>3</sub> dimensions, respectively was recorded with the same sample. All spectra were processed using NMRPipe<sup>[2]</sup> and analysed using CCPNMR.<sup>[3]</sup>

**Structural Characterization of GGC by NMR.** Overall, the helical regions determined by RDC-based MFR agree well with  $\phi$  and  $\psi$  assigned by TALOS+ based on NMR chemical shift, except for certain regions that contain proline and/or glycine (Figure S3). The carrier proteins have intricate arrangement of helical segments. The fact that the helical segments of GGC agree well with those of AAC and UCP2 is an indication that GGC is folded in DPC micelles and that its overall architecture is similar to that of AAC. The principal structural differences between AAC and GGC are in domain 1: GGC has a longer loop in domain 1 between the C-terminus of H1 and the amphipathic helix *h*1. Moreover, GGC has shorter H1 but longer H6 compared to AAC. The above differences were not revealed by sequence alignment (Figure S4); their characterization required combined analysis using RDC-based MFR and TALOS+.

**Substrate titrations.** The U-[<sup>15</sup>N, <sup>13</sup>C, <sup>2</sup>H]-labelled GGC was titrated with 100 mM stock solution of AMP, GDP or GTP solubilised in the NMR buffer. At each substrate concentration point, the <sup>1</sup>H<sup>N</sup>, <sup>15</sup>N, and <sup>13</sup>C<sup>γ</sup> chemical shift changes induced by substrate binding were measured using the 3D TROSY HNCO spectrum recorded at 30 °C on 600 MHz spectrometer. The combined chemical shift differences ( $\Delta\delta_{comb}$ ) were calculated for each residue using the formula:<sup>[4]</sup>

$$\Delta\delta_{comb}^i = \sqrt{(\omega_H \Delta\delta_H^i)^2 + (\omega_C \Delta\delta_C^i)^2 + (\omega_N \Delta\delta_N^i)^2} \quad (1)$$

where  $\Delta\delta_H$ ,  $\Delta\delta_C$  and  $\Delta\delta_N$  are chemical shift perturbations (in ppm) with respect to the <sup>1</sup>H, <sup>13</sup>C and <sup>15</sup>N chemical shift and  $w_H = 1.00$ ,  $w_C = 0.34$  and  $w_N = 0.15$  are normalization factors. By fitting the  $\Delta\delta_{comb}$  vs. [S] plot to the classic

equation of binding equilibrium  $K_D = [P][S]/[PS]$ , where  $[P]$ ,  $[S]$  and  $[PS]$  represent the concentration of free protein, free substrate and complex, respectively, we determined the apparent dissociation constant ( $K_D$ ) for each residue. The residue-specific  $K_D$  values were determined for GGC both in the presence of GDP and in the presence of GTP (Table S2).

**Self-assembly of DNA-origami nanotubes and preparation of aligned samples.** For RDC measurements,  $U$ - $[^{15}\text{N}, ^{13}\text{C}, ^2\text{H}]$ -labelled GGC was aligned in 20 mg ml<sup>-1</sup> DNA-origami nanotubes solution. DNA-origami nanotubes<sup>[5]</sup> were constructed and purified following the previously published protocol.<sup>[6]</sup> The buffer of the nanotubes was exchanged into the desired protein buffer by diluting the nanotubes solution twofold with the protein buffer. The nanotubes were then concentrated to 20 mg ml<sup>-1</sup> using Centricon-100 concentrator units by spinning in 5-min increments at 1,500  $g$  and 15 °C. Between 5-min spins, the concentrated solution was mixed slowly by pipetting up and down. The concentration was stopped when the column reached the starting weight. Once the DNA nanotubes were in the appropriate buffer,  $U$ - $[^{15}\text{N}, ^{13}\text{C}, ^2\text{H}]$ -GGC sample was added to reach a final protein concentration of 0.5 mM after concentration using series of 5-min spins at 1,500  $g$  and 15 °C. Degree of protein alignment was controlled by measuring residual  $\text{D}_2\text{O}$  quadrupole coupling in the presence of DNA-origami nanotubes.

**RDC measurements in liquid crystal formed by DNA-origami nanotubes.** We used DNA-origami nanotubes, which can form a stable nematic phase unaffected by detergent,<sup>[5]</sup> to weakly align GGC for RDC measurements. We optimized the NMR sample buffer such that it is compatible with the use of nanotube alignment medium in the presence and absence of GTP. DNA-origami nanotubes allowed us to measure RDCs of three internuclear vectors,  $^{15}\text{N}$ - $^1\text{H}^{\text{N}}$  ( $^1D_{\text{NH}}$ ),  $^{13}\text{C}'$ - $^{13}\text{C}^{\alpha}$  ( $^1D_{\text{C}'\text{C}\alpha}$ ) and  $^{15}\text{N}$ - $^{13}\text{C}'$  ( $^1D_{\text{NC}'}$ ), in the absence and presence of GTP (Figure S12, Table S3). On average, there are 2.4 and 2.5 RDCs per residue in the absence and presence of GTP, respectively, for regions with confirmed resonance assignment. The two sets of RDCs are, however, quite different considering that the only difference between the two measurements is the addition of GTP. The RDCs were obtained by subtracting  $J$  of the isotropic sample containing 1 mM GGC in 50 mM MES (pH 6.0), 2 mM BME and 120 mM DPC from  $J+D$  of the aligned sample containing 0.5 mM GGC in the same buffer with added 20 mg ml<sup>-1</sup> DNA nanotubes<sup>[5-6]</sup> and 200 mM NaCl. For measuring RDCs for the GTP-bound GGC, 30 mM GTP was added to the aligned sample by ensuring that the sample pH was not changed. The sign of RDCs follow the convention that  $|^1J_{\text{NH}} + ^1D_{\text{NH}}| < 92$  Hz when  $^1D_{\text{NH}}$  is positive. The  $^{15}\text{N}$ - $^1\text{H}$   $J$  or  $J+D$  couplings were measured at 600 MHz ( $^1\text{H}$ -frequency) using the  $J$ -scaled TROSY-HNCO experiment with two interleaved spectra, the regular TROSY-HNCO spectrum and a modified TROSY-HNCO spectrum with  $J_{\text{NH}}$  evolution during the  $^{15}\text{N}$  chemical shift evolution scaled to zero<sup>[7]</sup>. The  $^{15}\text{N}$  -  $^{13}\text{C}'$  couplings were measured at 600 MHz using the 3D TROSY-HNCO experiment with quantitative  $J_{\text{NC}'}$  modulations of 33 and 66 ms.<sup>[8]</sup> The  $^{13}\text{C}'$ - $^{13}\text{C}^{\alpha}$  couplings were measured at 600 MHz using the 3D TROSY-HNCO experiment with quantitative  $J_{\text{C}'\text{C}\alpha}$  modulations of 0 and 28 ms.<sup>[9]</sup>

**RDC-tensor analysis indicates conformational dynamics.** GDO of a given alignment tensor  $A$  is defined as  $|A|/|A_{\text{max}}|$ , where  $|A| = \sqrt{\sum A_{ij}^2}$  is the scalar of the order matrix and  $|A_{\text{max}}| = \sqrt{2/3}$  is the maximum order; It is a measure of the overall degree of alignment of molecular segments relative to the static magnetic field in solution. For segment with collective motions equal values of GDO are expected. Using GDO as probe for protein internal dynamics was first demonstrated for a relatively rigid protein, ubiquitin.<sup>[10]</sup> In that study, alignment tensors of one-residue fragments were determined by fitting backbone RDCs (six per residue) to the respective structured fragments in the known X-ray or NMR structure. This approach, however, could not be directly adapted for GGC because 1) there is no high-resolution structure of GGC and 2) RDC data is relatively sparse ( $< 3$  measurements per residue). We instead used RDC-based molecular fragment searching<sup>[11]</sup> described above to derive GDO for various regions of GGC. We used in this study a fragment size of seven residues; it is a good compromise to correctly fit the tensor parameters with enough couplings and to have enough good hits from the fragment database. In this procedure, RDCs of any given seven-residue segment centred at position  $i$  were used to search for seven-mer fragments from our fragment library that fit the RDCs with quality factor  $Q < 25\%$  (Figure S9a).<sup>[12]</sup> If

the 20 best fragments converge structurally with backbone r.m.s.d. < 0.3 Å, then GDO values of the convergent fragments were calculated based on their respective alignment tensors. The GDO values were then averaged and assigned to the corresponding seven-residue segment of the protein, denoted by  $\vartheta_i$ , with the uncertainty calculated as below in “RDC-based Molecular Fragment Analysis”. An example of  $\vartheta_i$  changing with respect to  $i$  is illustrated in Figure S9b,c for the H1 helix of GGC in the presence of GTP (Table S4). For this region of GGC, GDO near the N-terminal end of the TM helix is about twice as large as that near the C-terminal end, indicating the presence of significant conformational heterogeneity in domain I of GGC even when the transporter is mostly bound to the substrate. Although the variations in GDO, the  $\Phi/\Psi$  dihedral angles of the identical amino acids when sliding the MFR-fragment along the sequence are homogenous, as illustrated in Figure S10.

**RDC-based Molecular Fragment Analysis.** A large fragment library was built that contains 387,751 seven-residue fragments extracted from 858 water-soluble and 934 membrane-associated protein crystal structures (resolution < 2.5 Å). The RDCs of every possible seven-residue sequence of the protein were fitted to all the fragments of the library by singular value decomposition (SVD) using the program PALES.<sup>[13]</sup> Only those seven-residue stretches with more than 8 RDCs were used for fragment searching. In the end, only fragments with  $Q_{\text{free}} < 25\%$  were collected. We used the 20-best fitting fragments converging structurally with a backbone r.m.s.d. < 0.3 Å. We determined the General Degree of Order (GDO) as defined in reference [10] that characterizes the magnitude of alignment for a given seven-residue segment centred at position  $i$  using the formula below:

$$GDO_i = \vartheta_i = \sqrt{\frac{2}{3} \sum_{ij} S_{ij}^2} = \sqrt{S_{zz}^2 \left(1 + \frac{\eta^2}{3}\right)} = |A_a| \sqrt{1 + (3/4 Rh^2)} \quad (2)$$

where  $A_a$  is the degree of alignment and  $Rh$  is the rhombicity of the alignment tensor.  $A_a$  and  $Rh$  were directly extracted by the program PALES from the SVD fit. Given the errors in RDC measurements, the uncertainties of the alignment tensor elements were obtained during the SVD fit using a 1000 Monte-Carlo steps simulation<sup>[13]</sup> (implemented in the program PALES). For each of the 20 best fragments, the uncertainty in GDO was calculated based on the uncertainties of the alignment tensor elements. Finally, the GDO uncertainty due to errors in RDC measurements ( $\Delta GDO_{\text{rdc}}$ ) is the average of the GDO uncertainties of the 20 fragments. In addition, the GDO uncertainty due to errors from structural diversity of the 20 fragments ( $\Delta GDO_{\text{frag}}$ ) is the standard deviation of the 20 GDO values. The final GDO uncertainty  $\Delta GDO = (\Delta GDO_{\text{rdc}}^2 + \Delta GDO_{\text{frag}}^2)^{1/2}$ . To map local conformational variability of the protein, we determined the derivative of GDO ( $\Delta\vartheta_i = |\vartheta_i - \vartheta_{i+3}|$ ), between neighbouring segments separated by three residues.

## References

- [1] a) M. Salzmann, G. Wider, K. Pervushin, H. Senn, K. Wuthrich, *J. Am. Chem. Soc.* **1999**, *121*, 844-848;  
b) L. E. Kay, M. Ikura, R. Tschudin, A. Bax, *J. Magn. Reson.* **1990**, *213*, 423-441.
- [2] F. Delaglio, S. Grzesiek, G. W. Vuister, G. Zhu, J. Pfeifer, A. Bax, *J. Biomol. NMR* **1995**, *6*, 277-293.
- [3] W. F. Vranken, W. Boucher, T. J. Stevens, R. H. Fogh, A. Pajon, M. Llinas, E. L. Ulrich, J. L. Markley, J. Ionides, E. D. Laue, *Proteins* **2005**, *59*, 687-696.
- [4] F. H. Schumann, H. Riepl, T. Maurer, W. Gronwald, K. P. Neidig, H. R. Kalbitzer, *J. Biomol. NMR* **2007**, *39*, 275-289.
- [5] S. M. Douglas, J. J. Chou, W. M. Shih, *Proc. Natl. Acad. Sci. USA* **2007**, *104*, 6644-6648.
- [6] G. Bellot, M. A. McClintock, J. J. Chou, W. M. Shih, *Nat. Protoc.* **2013**, *8*, 755-770.
- [7] G. Kontaxis, G. Clore, A. Bax, *J. Magn. Reson.* **2000**, *143*, 184-196.
- [8] J. J. Chou, F. Delaglio, A. Bax, *J. Biomol. NMR* **2000**, *18*, 101-105.
- [9] C. P. Jaroniec, T. S. Ulmer, A. Bax, *J. Biomol. NMR* **2004**, *30*, 181-194.
- [10] J. R. Tolman, H. M. Al-Hashimi, L. E. Kay, J. H. Prestegard, *J. Am. Chem. Soc.* **2001**, *123*, 1416-1424.

- [11] a) F. Delaglio, G. Kontaxis, A. Bax, *J. Am. Chem. Soc.* **2000**, *122*, 2142-2143; b) M. J. Berardi, W. M. Shih, S. C. Harrison, J. J. Chou, *Nature* **2011**, *476*, 109-113.
- [12] G. Cornilescu, J. L. Marquardt, M. Ottiger, A. Bax, *J. Am. Chem. Soc.* **1998**, *120*, 6836-6837.
- [13] M. Zweckstetter, *Nat. Protoc.* **2008**, *3*, 679-690.
- [14] R. Sanchez, A. Sali, *Methods Mol. Biol.* **2000**, *143*, 97-129.
- [15] A. J. Robinson, E. R. Kunji, *Proc. Natl. Acad. Sci. USA* **2006**, *103*, 2617-2622.

SUPPLEMENTARY FIGURES

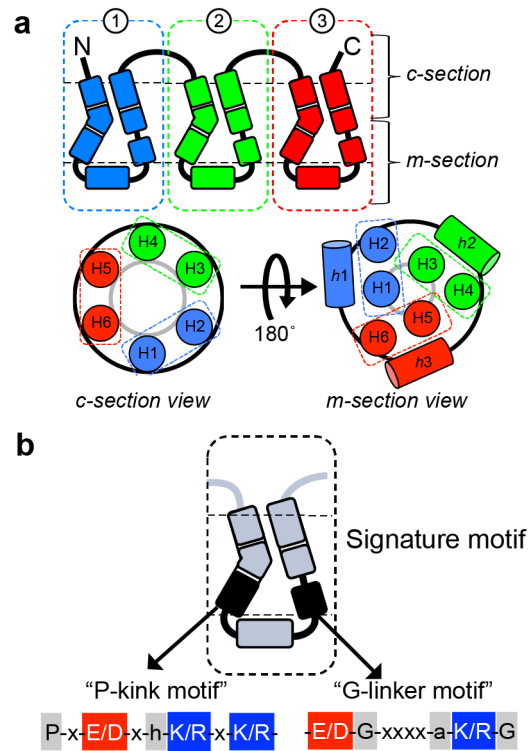

**Figure S1. Schematic diagram of the carrier tripartite structure.** (a) The three pseudo repeats are colour-coded in blue, green and red, respectively. Each repeat contains two TM helices separated by an amphipathic helix. The cytoplasmic and matrix views are shown. (b) The signature sequence motifs, the proline-kink (P-kink) motif and the glycine-rich linker (G-linker) motif, are highlighted in black.

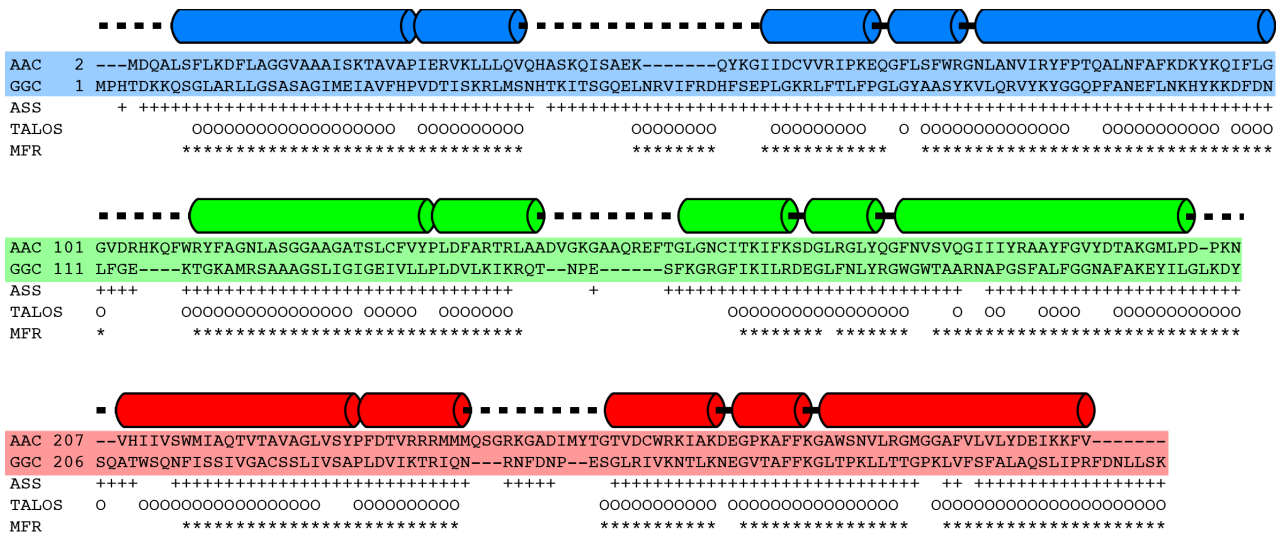

**Figure S2.** Structural alignment of AAC and GGC. AAC and GGC sequences aligned based on the secondary structures and sequence motifs. Helical regions of the AAC crystal structure are shown as cylinders, which are colour-coded in blue, green or red for each of the three pseudo repeats. GGC residues of which NMR resonances have been assigned are indicated with a cross. Residues predicted by TALOS+ or RDC-based MFR to be helical are indicated with a circle or star, respectively.

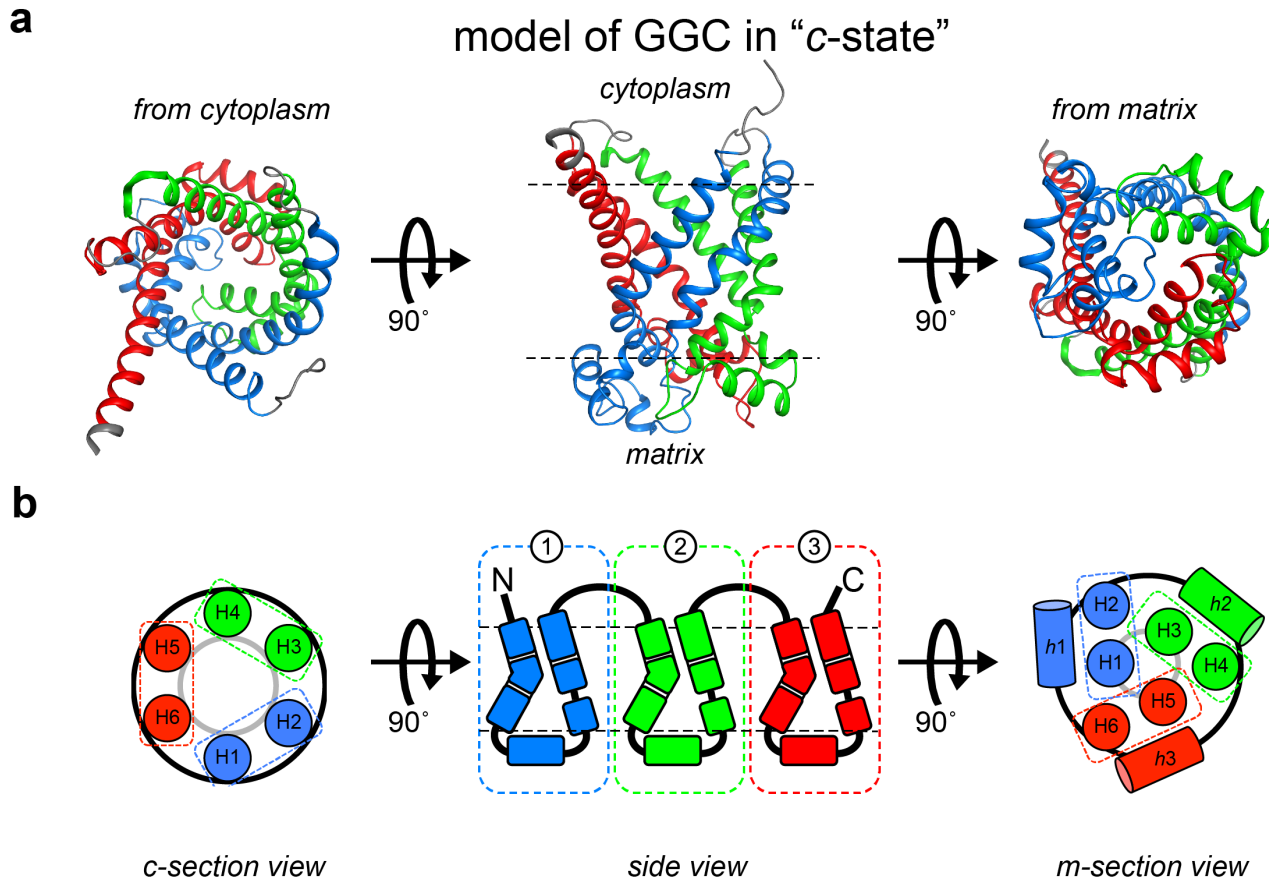

**Figure S3. Structural model of GGC.** a) Ribbon representation of the GGC model built based on the crystal structure of the inhibited state of AAC (PDB code: 1okc) and the sequence alignment in b. The GGC model was obtained using the program Modeller.<sup>[14]</sup> The three views are: view from the cytoplasm side (left), view from within the membrane (middle), and view from the matrix side (right). B) Schematic representation of the different view shown in a).





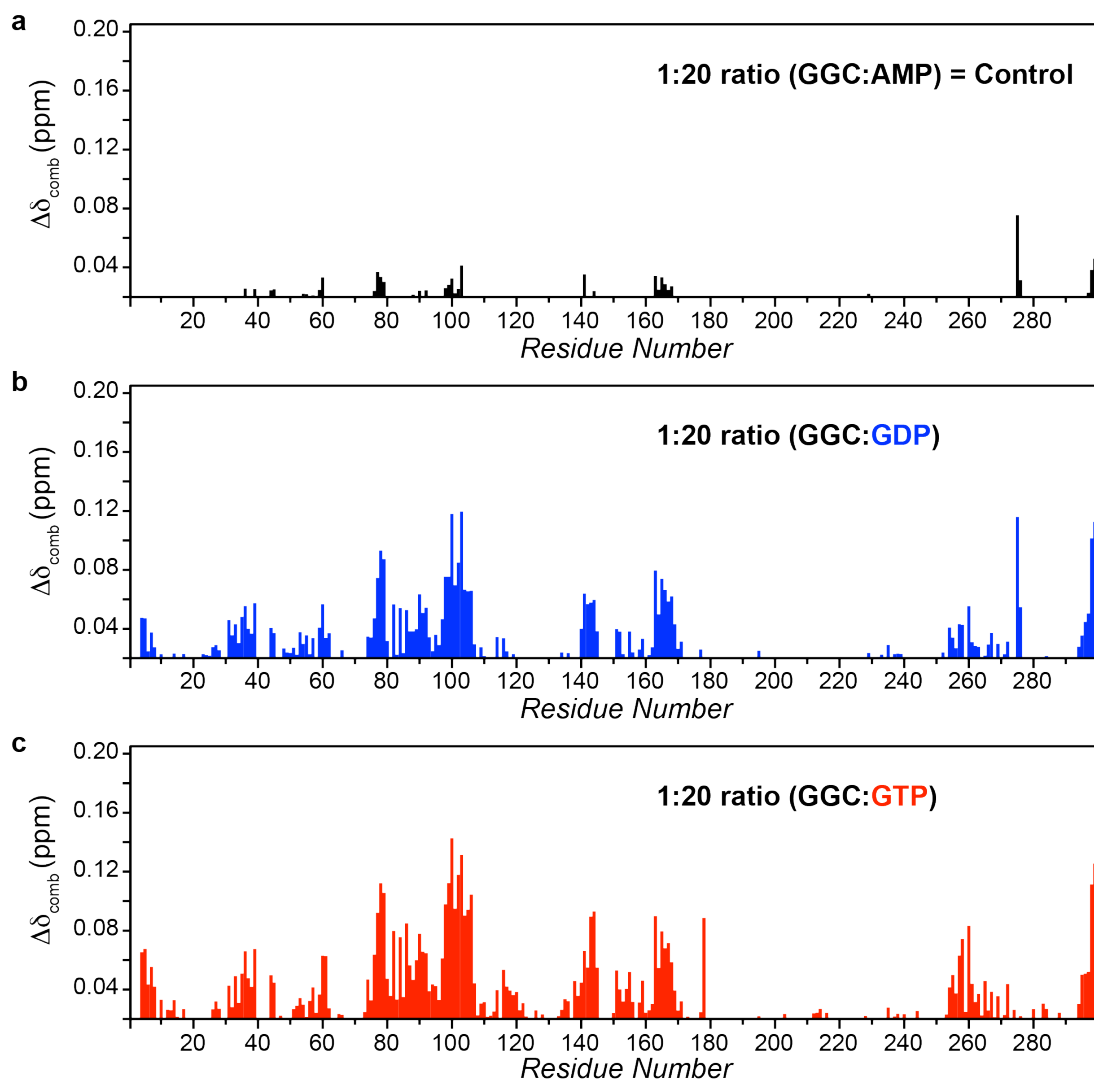

**Figure S5. Chemical shift perturbation of GGC by mono-, di-, and tri-phosphate nucleotides.** Bar plots showing the combined chemical shift changes (defined in Methods) induced by the addition of 20-fold molar excess of a) AMP (black bar), b) GDP (blue bar) and c) GTP (red bar).

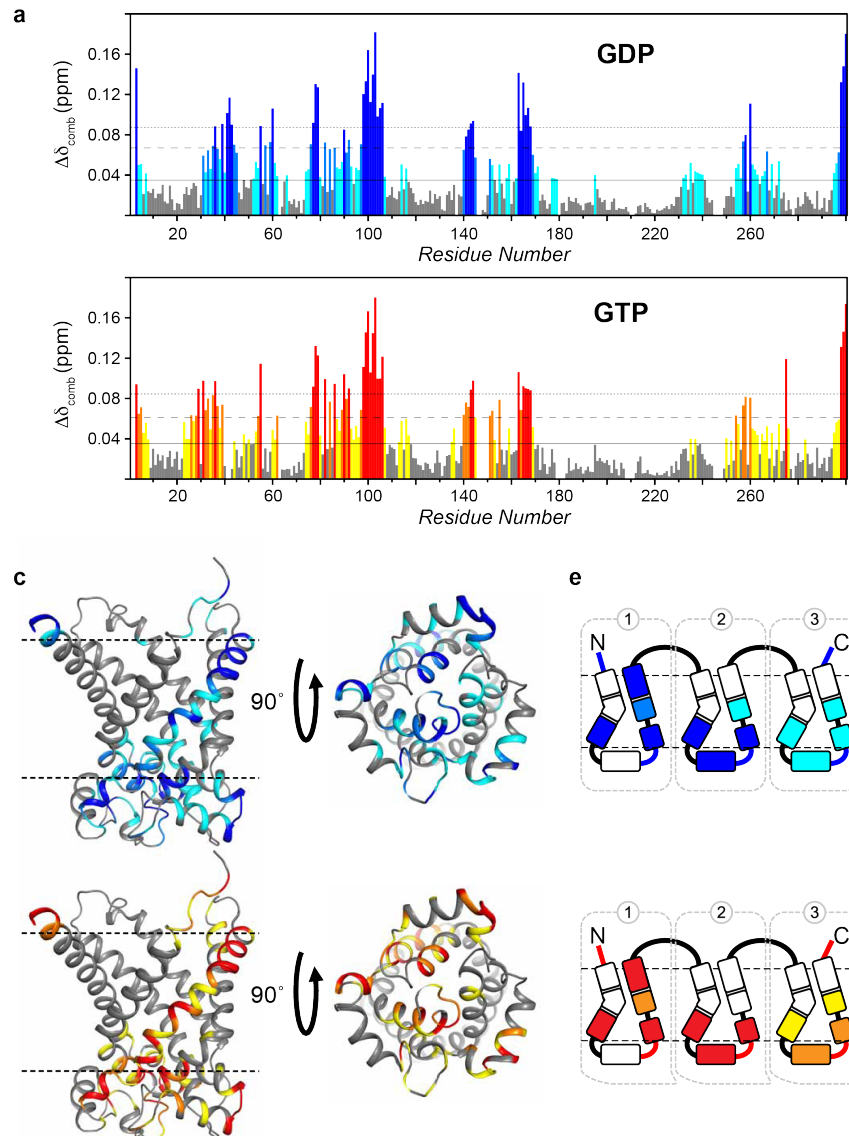

**Figure S6.** Chemical shift perturbation analysis of GDP and GTP binding to GGC. Residue-specific chemical shift changes induced by a) 60 mM GDP and b) 30 mM GTP. The residues are categorized into the following groups: gray – less than mean (indicated by the black horizontal line); cyan for GDP or yellow for GTP – mean to mean + 1 *s.d.* (indicated by the dashed line); marine for GDP or orange for GTP – mean + 1 *s.d.* to mean + 2 *s.d.* (indicated by the dotted line); and blue for GDP or red for GTP – greater than or equal to mean + 2 *s.d.*. c) d) Mapping of chemical shift perturbation onto the GGC model for GDP and GTP binding. Views from the membrane and matrix sides are shown in the left and right panels, respectively. e) f) Mapping of chemical shift perturbation onto the carrier tripartite drawing as in c and d.

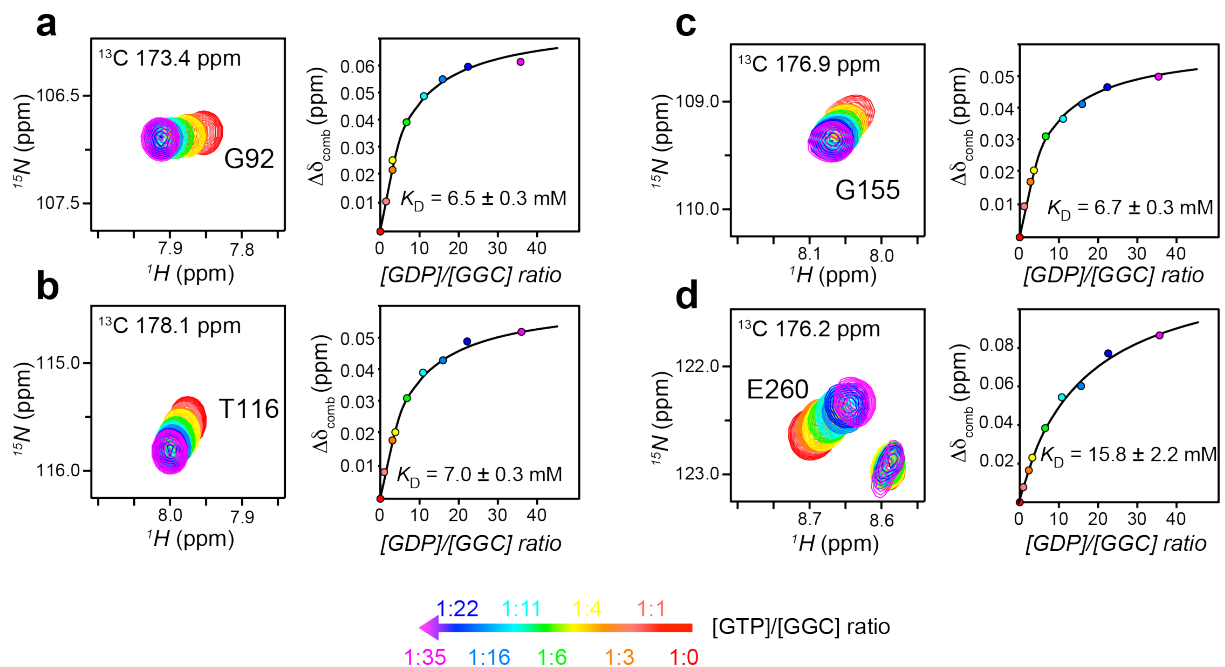

**Figure S7. Residue-specific  $K_D$  of GGC-GTP binding.** Samples of chemical shift perturbation from 3D TROSY HNCOC spectra of GGC for residues G82 (a), T116 (b), G155 (c), E260 (d) upon incremental addition of GTP. The NMR peaks at different substrate/protein molar ratio are shown with the linear color spectrum scale from ratio = 0 (red) to ratio = 35 for GDP (magenta). For each of the perturbed resonances, the chemical shift changes (defined in Methods) vs. GTP/GGC molar ratio are plotted and fitted to the standard equation of binding equilibrium (right panels).

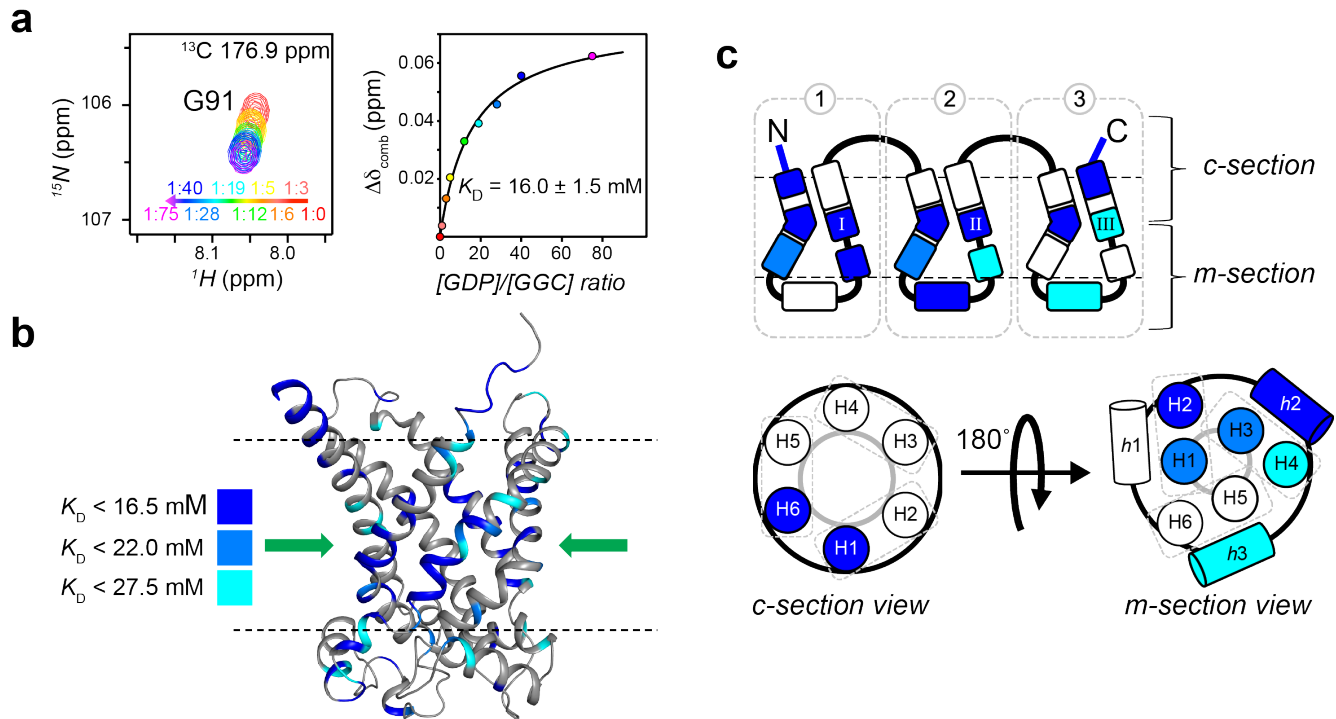

**Figure S8. Residue-specific  $K_D$  of GGC–GDP binding.** a) Sample chemical shift perturbation from 3D TROSY HNC0 spectra of GGC upon incremental addition of GDP. The NMR peaks at different substrate/protein molar ratio are shown with the linear color spectrum scale from ratio = 0 (red) to ratio = 75 for GDP (magenta). For each of the perturbed resonances, the chemical shift changes (defined in Methods) vs. GDP/GGC molar ratio are plotted and fitted to the standard equation of binding equilibrium (right panels). b) Mapping residue-specific  $K_D$  onto the GGC model for GDP binding with color-code defined in the figure. The common binding site (CBS) of nucleotide carrier proteins as proposed based on conservation of amino acid, comparative model and chemical properties,<sup>[15]</sup> is indicated by the green arrow. c) The  $K_D$  values in b are shown in the context of the schematic diagram of the tripartite topology and of the cytoplasmic and matrix views for providing a conceptual view of nucleotide binding.

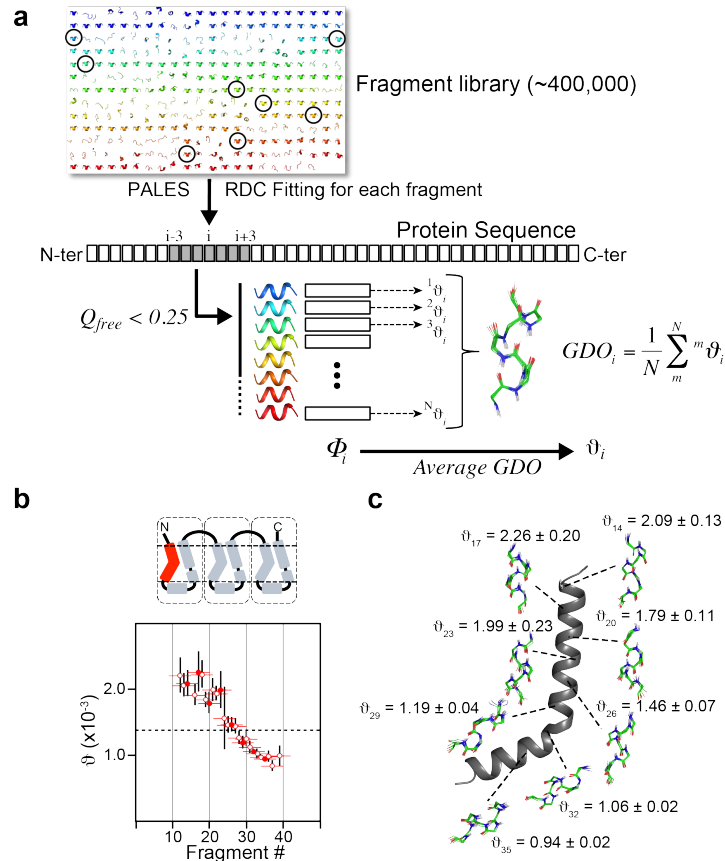

**Figure S9. Computing Generalized Degree of Order (GDO) using RDCs.** (a) Schematic illustration of the method for deriving fragment-specific GDO by RDC-based molecular fragment searching. For each seven-residue sequence ( $i-3 - i+3$ ) of the protein with greater than 8 RDCs, the seven-residue fragments from the fragment library that fit to the RDCs with  $Q < 25\%$  are collected and sorted by increasing  $Q$ . If the top 20 fragments converge structurally (backbone r.m.s.d.  $< 0.3\text{\AA}$ ), then the average GDO is calculated for the fragment ensemble and assigned as the GDO of the seven-residue sequence centred at  $i$  with the standard deviation determined by Monte-Carlo simulation for each fragment. (b) A plot of GDO values vs. sliding seven-residue fragments for the H1 helix of GTP-bound GGC, showing significant GDO variation within the TM helix. The red horizontal lines represent the sizes of the fragments, and the vertical lines are the uncertainties in GDO calculation as described in a. (c) Examples of fragment ensembles (lines) and their corresponding GDO values from the H1 helix (gray ribbon) of the GTP-bound GGC as in b. The GDO values are multiplied by 1,000 for convenience.

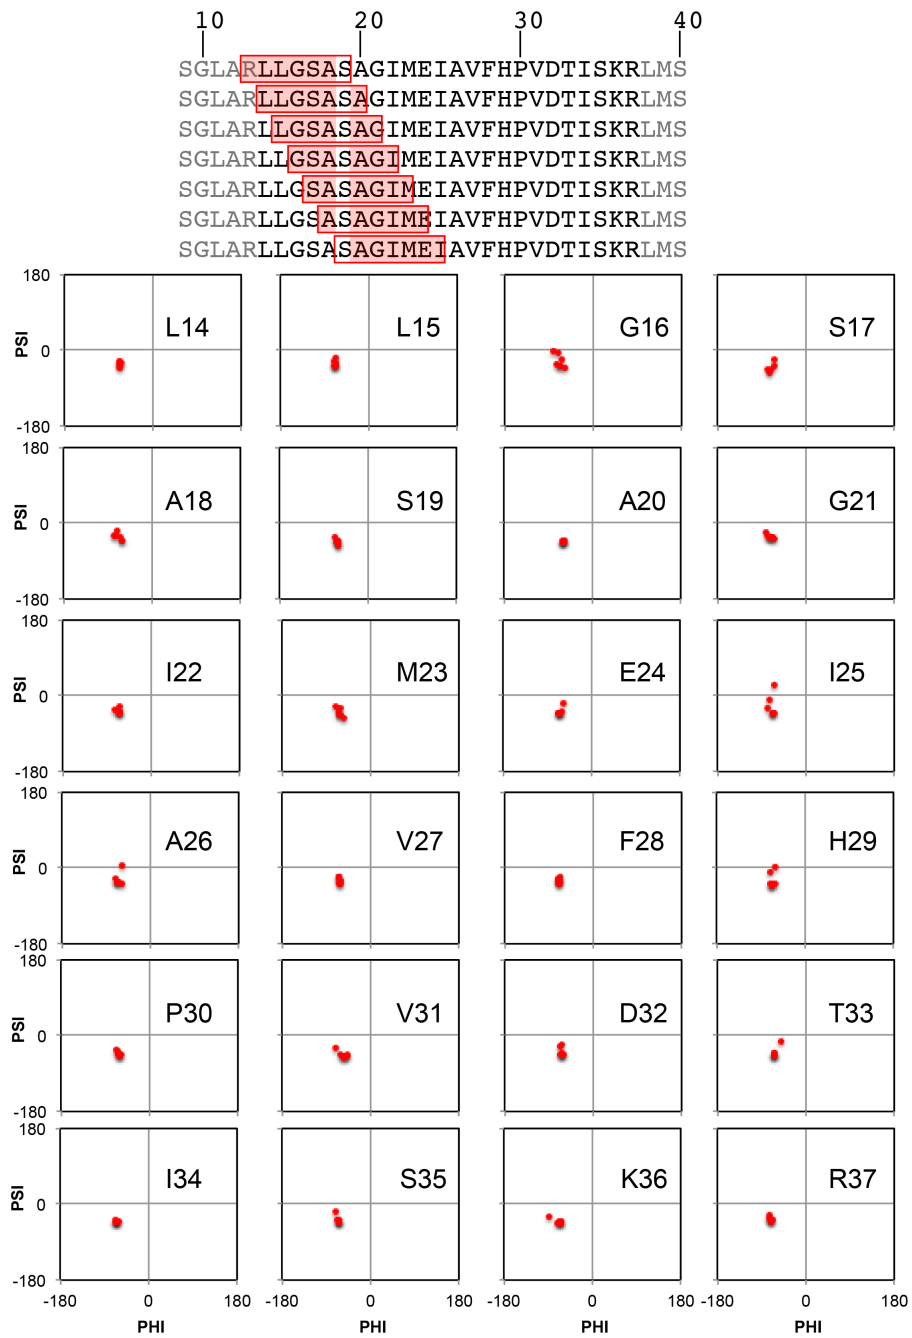

**Figure S10.** Correlation of backbone  $\Phi/\Psi$  dihedral angles of the same residue from sliding fragments. Top panel shows an example of sliding fragments for residue S19. Lower panel shows the Ramachandran plots for residues in the H1 helix.

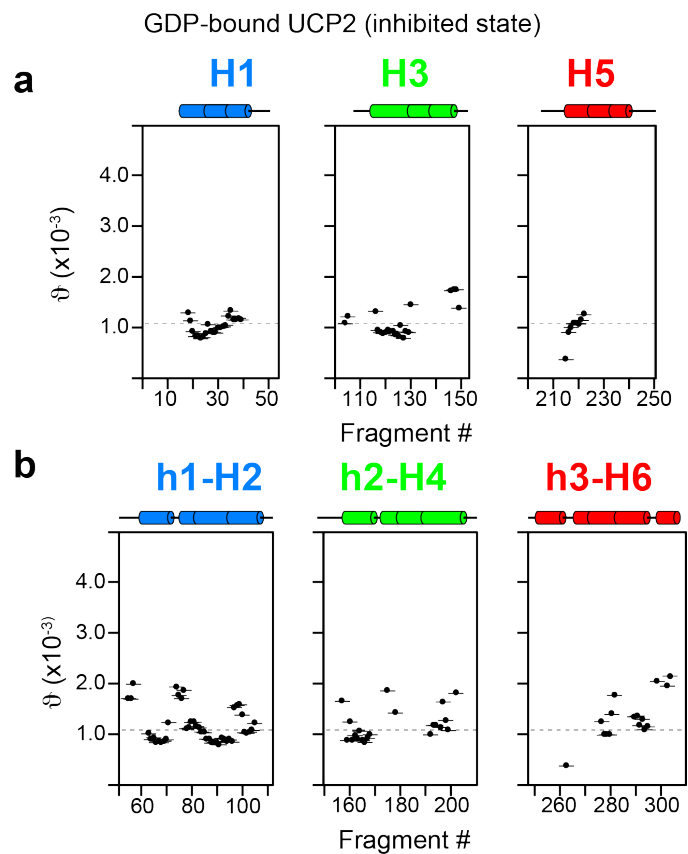

**Figure S11.** Mapping Conformational heterogeneity in UCP2. Mapping conformational heterogeneity for inhibited state of UCP2. GDO variation as shown by the plot of GDO values vs. sliding seven-residue fragments for (a) H1, H3 and H5 and (b) H2, H4 and H6.

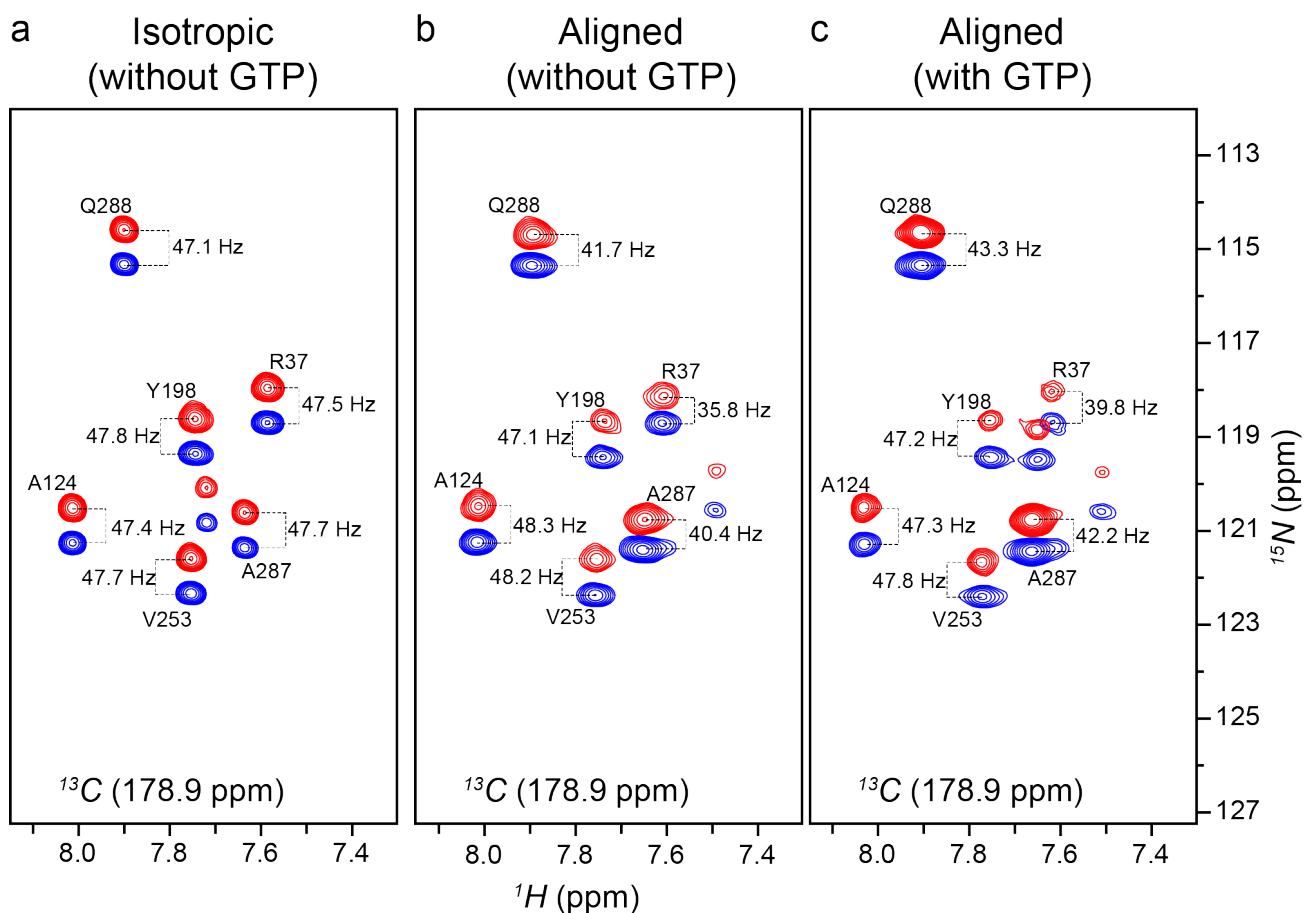

**Figure S12.** Measurement of  $^1D_{\text{NH}}$  RDCs of GGC weakly aligned in the DNA-origami nanotube liquid crystal. Shown here are sample regions of the 3D  $J$ -scaled TROSY-HNCO spectra recorded using a) the isotropic sample in the absence of substrate, b) the aligned sample in the absence of substrate, and c) the aligned sample in the presence of 30 mM GTP at  $^1\text{H}$  frequency of 600 MHz. For each of the samples above, two inter-leaved spectra were recorded, the regular TROSY-HNCO (blue peaks) and a modified TROSY-HNCO with  $J_{\text{NH}}$  evolution during the  $^{15}\text{N}$  chemical shift evolution scaled to zero (red peaks). The difference in  $^{15}\text{N}$  frequency between the red and black peaks is  $^1J_{\text{NH}}/2$  for the isotropic sample and  $(^1J_{\text{NH}} + ^1D_{\text{NH}})/2$  for the aligned samples.  $^1D_{\text{NH}}$  was determined from the two values.



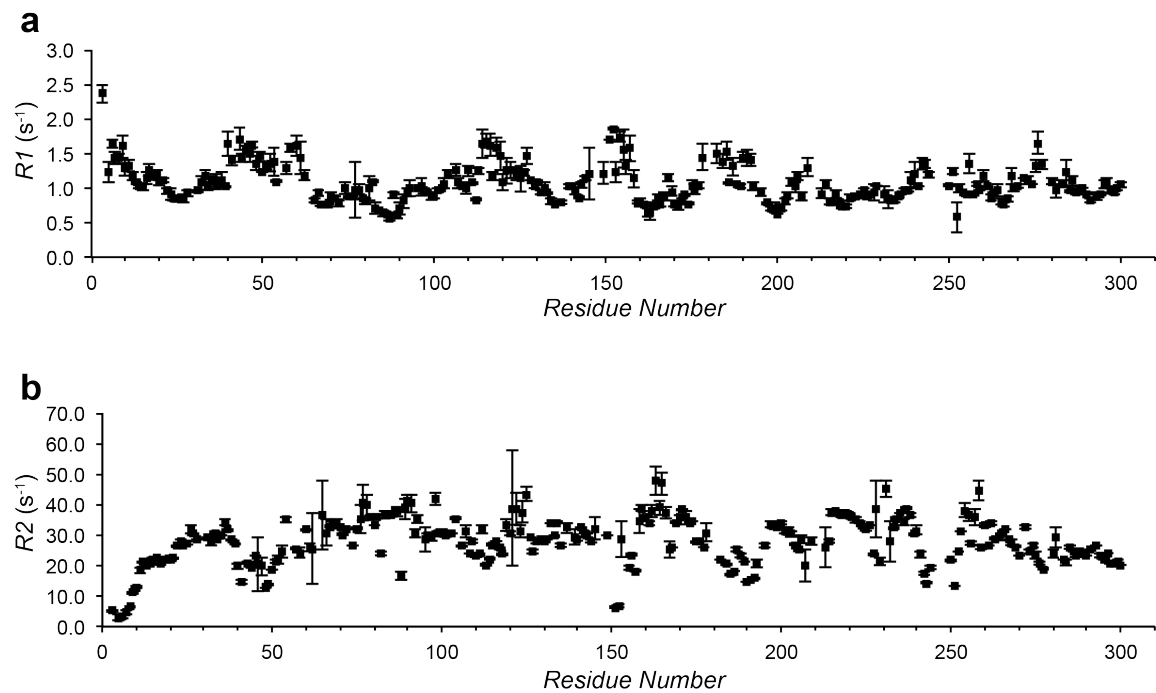

**Figure S13.**  $^{15}\text{N}$  NMR Relaxation measurements. The residue-specific  $^{15}\text{N}$   $R_1$  (a) and  $R_2$  (b) of GGC in the absence of substrate measured at 800 MHz.

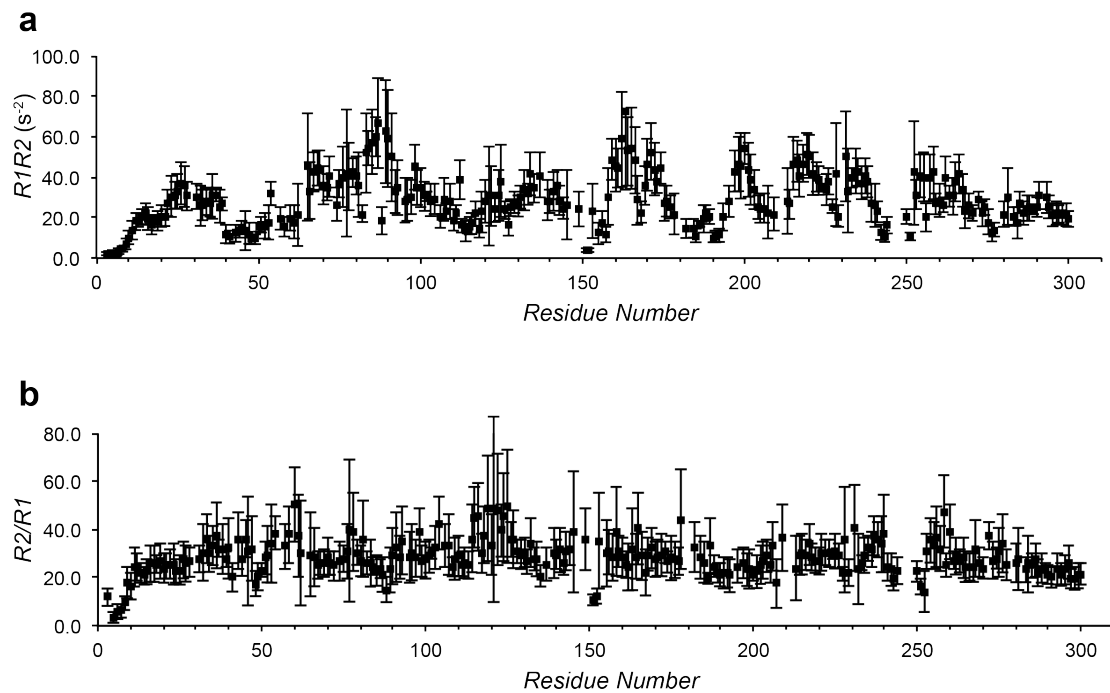

**Figure S14.** Product and ratio of <sup>15</sup>N NMR relaxation measurements. The product of <sup>15</sup>N R1 and R2 for probing variations in chemical exchange (a) and the ratio of <sup>15</sup>N R2 to R1 for probing variations in the correlation times (b). The relaxation rates are from Figure S13 above.

## SUPPLEMENTARY TABLES

**Table S1.** Backbone Carbon Chemical Shift of  $U$ -[ $^2\text{H}$ ,  $^{15}\text{N}$ ,  $^{13}\text{C}$ ]-GGC in DPC micelles

| #  | Residue | $C\alpha$ (ppm) | $C\beta$ (ppm) | $C'$ (ppm) |
|----|---------|-----------------|----------------|------------|
| 1  | MET     |                 |                |            |
| 2  | PRO     | 55.5            | 29.3           | 173.8      |
| 3  | HIS     | 56.8            | 29.6           | 178.9      |
| 4  | THR     | 61.2            | 69.3           | 173.9      |
| 5  | ASP     | 53.9            | 40.9           | 176.2      |
| 6  | LYS     | 56.0            | 31.9           | 176.7      |
| 7  | LYS     | 56.1            | 31.9           | 176.7      |
| 8  | GLN     | 55.3            | 29.4           | 175.9      |
| 9  | SER     | 57.7            | 63.9           | 175.2      |
| 10 | GLY     | 46.3            |                | 175.7      |
| 11 | LEU     | 57.3            | 41.0           | 178.1      |
| 12 | ALA     | 54.8            | 17.4           | 180.6      |
| 13 | ARG     | 58.2            | 29.1           | 178.7      |
| 14 | LEU     | 57.3            | 41.3           | 178.3      |
| 15 | LEU     | 56.7            | 40.8           | 179.1      |
| 16 | GLY     | 46.3            |                | 176.1      |
| 17 | SER     | 60.4            | 62.8           | 175.8      |
| 18 | ALA     | 53.8            | 18.0           | 178.2      |
| 19 | SER     | 60.5            | 62.7           | 175.5      |
| 20 | ALA     | 54.0            | 17.8           | 179.8      |
| 21 | GLY     | 46.2            |                | 175.5      |
| 22 | ILE     | 63.2            | 37.0           | 176.9      |
| 23 | MET     | 56.8            | 30.9           | 177.9      |
| 24 | GLU     | 57.5            | 28.9           | 177.8      |
| 25 | ILE     | 62.3            | 37.5           | 176.6      |
| 26 | ALA     | 53.5            | 18.2           | 178.0      |
| 27 | VAL     | 62.6            | 31.3           | 175.8      |
| 28 | PHE     | 57.5            | 38.8           | 175.1      |
| 29 | HIS     | 54.7            | 28.3           | 173.1      |
| 30 | PRO     | 64.4            | 31.3           | 177.9      |
| 31 | VAL     | 65.2            | 30.6           | 177.8      |
| 32 | ASP     | 56.6            | 40.8           | 177.9      |
| 33 | THR     | 65.4            | 68.4           | 176.5      |
| 34 | ILE     | 64.2            | 37.0           | 177.4      |
| 35 | SER     | 61.8            | 62.2           | 176.3      |
| 36 | LYS     | 58.6            | 31.6           | 178.9      |
| 37 | ARG     | 57.2            | 29.4           | 178.1      |
| 38 | LEU     | 56.1            | 41.6           | 177.7      |
| 39 | MET     | 55.8            | 32.0           | 177.0      |
| 40 | SER     | 58.8            | 63.1           | 174.6      |
| 41 | ASN     | 53.3            | 31.4           | 175.3      |
| 42 | HIS     | 57.7            | 29.4           | 175.2      |
| 43 | THR     | 62.2            | 69.2           | 174.4      |
| 44 | LYS     | 56.1            | 32.1           | 176.5      |

|    |     |      |      |       |
|----|-----|------|------|-------|
| 45 | ILE | 61.0 | 37.7 | 176.3 |
| 46 | THR | 61.3 | 69.2 | 174.5 |
| 47 | SER | 58.3 | 63.6 | 175.2 |
| 48 | GLY | 45.6 |      | 174.6 |
| 49 | GLN | 56.3 | 28.6 | 176.8 |
| 50 | GLU | 57.0 | 29.1 | 177.3 |
| 51 | LEU | 55.9 | 41.0 | 177.3 |
| 52 | ASN | 54.2 | 38.4 | 175.8 |
| 53 | ARG | 57.2 | 29.7 | 177.0 |
| 54 | VAL | 63.6 | 31.5 | 176.4 |
| 55 | ILE | 62.0 | 37.4 | 176.3 |
| 56 | PHE | 58.4 | 38.5 | 176.1 |
| 57 | ARG | 56.8 | 29.8 | 176.5 |
| 58 | ASP | 54.8 | 40.5 | 176.6 |
| 59 | HIS | 56.1 | 29.6 | 174.7 |
| 60 | PHE | 57.8 | 38.9 | 175.4 |
| 61 | SER | 58.9 | 63.1 | 174.5 |
| 62 | GLU | 56.5 | 38.8 | 175.0 |
| 63 | PRO | 66.0 | 30.6 | 177.6 |
| 64 | LEU | 57.4 | 41.1 | 178.6 |
| 65 | GLY | 47.0 |      | 175.0 |
| 66 | LYS | 58.6 | 31.7 | 179.2 |
| 67 | ARG | 58.1 | 29.3 | 178.8 |
| 68 | LEU | 57.7 | 40.9 | 178.0 |
| 69 | PHE | 59.5 | 37.8 | 177.3 |
| 70 | THR | 64.3 | 68.6 | 175.5 |
| 71 | LEU | 56.3 | 42.0 | 176.5 |
| 72 | PHE | 54.9 | 38.6 | 173.1 |
| 73 | PRO | 64.1 | 30.8 | 178.5 |
| 74 | GLY | 45.2 |      | 174.9 |
| 75 | LEU | 55.9 | 41.5 | 176.6 |
| 76 | GLY | 45.0 |      | 174.8 |
| 77 | TYR | 60.4 | 37.6 | 177.1 |
| 78 | ALA | 54.5 | 17.5 | 179.4 |
| 79 | ALA | 53.6 | 17.9 | 179.2 |
| 80 | SER | 60.9 | 63.0 | 175.5 |
| 81 | TYR | 60.6 | 37.4 | 177.1 |
| 82 | LYS | 58.7 | 31.2 | 179.7 |
| 83 | VAL | 66.1 | 30.8 | 177.6 |
| 84 | LEU | 57.4 | 40.2 | 178.4 |
| 85 | GLN | 59.0 | 28.3 | 178.5 |
| 86 | ARG | 58.6 | 29.2 | 178.7 |
| 87 | VAL | 65.6 | 30.8 | 177.3 |
| 88 | TYR | 60.6 | 38.1 | 177.2 |
| 89 | LYS | 58.0 | 31.5 | 178.3 |
| 90 | TYR | 59.3 | 38.0 | 176.9 |
| 91 | GLY | 45.6 |      | 173.4 |
| 92 | GLY | 45.3 |      | 174.1 |
| 93 | GLN | 56.0 | 37.3 | 174.8 |
| 94 | PRO | 64.8 | 30.6 | 178.0 |
| 95 | PHE | 59.1 | 38.3 | 176.6 |
| 96 | ALA | 53.9 | 18.1 | 178.4 |
| 97 | ASN | 55.4 | 38.5 | 176.9 |

|     |     |      |      |       |
|-----|-----|------|------|-------|
| 98  | GLU | 58.3 | 28.7 | 177.9 |
| 99  | PHE | 60.7 | 38.9 | 177.4 |
| 100 | LEU | 56.8 | 40.8 | 178.2 |
| 101 | ASN | 54.9 | 38.4 | 176.6 |
| 102 | LYS | 57.3 | 31.8 | 177.4 |
| 103 | HIS | 56.7 | 29.7 | 175.1 |
| 104 | TYR | 58.6 | 38.4 | 175.6 |
| 105 | LYS | 57.4 | 31.8 | 176.8 |
| 106 | LYS | 57.1 | 31.6 | 177.0 |
| 107 | ASP | 55.2 | 40.6 | 177.2 |
| 108 | PHE | 59.5 | 38.5 | 176.6 |
| 109 | ASP | 56.1 | 39.9 | 177.9 |
| 110 | ASN | 54.0 | 38.3 | 176.2 |
| 111 | LEU | 56.6 | 41.6 | 176.8 |
| 112 | PHE | 57.1 | 39.1 | 176.3 |
| 113 | GLY | 44.9 |      | 174.5 |
| 114 | GLU | 57.5 | 29.5 | 177.8 |
| 115 | LYS | 57.4 | 31.7 | 178.0 |
| 116 | THR | 63.6 | 68.5 | 175.9 |
| 117 | GLY | 46.3 |      | 175.2 |
| 118 | LYS | 57.8 | 31.9 | 178.0 |
| 119 | ALA | 53.5 | 18.0 | 179.3 |
| 120 | MET | 57.0 | 32.1 | 177.1 |
| 121 | ARG | 57.8 | 29.6 | 177.7 |
| 122 | SER | 59.5 | 62.9 | 175.8 |
| 123 | ALA | 53.3 | 18.0 | 178.7 |
| 124 | ALA | 53.1 | 18.3 | 178.0 |
| 125 | ALA | 53.3 | 18.2 | 178.8 |
| 126 | GLY | 45.6 |      | 175.0 |
| 127 | SER | 59.2 | 63.2 | 174.8 |
| 128 | LEU | 55.8 | 41.2 | 177.4 |
| 129 | ILE | 62.1 | 37.4 | 176.8 |
| 130 | GLY | 45.6 |      | 175.6 |
| 131 | ILE | 62.5 | 37.3 | 177.0 |
| 132 | GLY | 46.2 |      | 174.5 |
| 133 | GLU | 57.5 | 29.3 | 177.6 |
| 134 | ILE | 62.4 | 37.5 | 176.4 |
| 135 | VAL | 62.8 | 31.4 | 175.0 |
| 136 | LEU | 54.8 | 41.0 | 177.6 |
| 137 | LEU | 54.3 |      | 175.7 |
| 138 | PRO | 63.6 | 30.1 | 176.9 |
| 139 | LEU | 56.1 | 40.8 | 177.9 |
| 140 | ASP | 55.6 | 40.1 | 178.0 |
| 141 | VAL | 64.0 | 31.2 | 176.8 |
| 142 | LEU | 55.8 | 40.8 | 177.3 |
| 143 | LYS | 57.1 | 31.3 | 177.2 |
| 144 | ILE | 61.8 | 37.4 | 176.8 |
| 145 | LYS | 56.4 | 32.0 | 176.8 |
| 146 | ARG |      |      |       |
| 147 | GLN |      |      |       |
| 148 | THR | 61.6 | 69.4 | 174.0 |
| 149 | ASN | 51.1 | 38.5 | 173.5 |
| 150 | PRO | 63.5 | 31.3 | 177.4 |

|     |     |      |      |       |
|-----|-----|------|------|-------|
| 151 | GLU | 56.7 | 29.1 | 177.1 |
| 152 | SER | 58.6 | 63.2 | 174.5 |
| 153 | PHE | 57.6 | 38.6 | 175.8 |
| 154 | LYS | 56.4 | 32.0 | 176.9 |
| 155 | GLY | 45.4 |      | 174.3 |
| 156 | ARG | 56.7 | 30.0 | 177.2 |
| 157 | GLY | 45.6 |      | 175.0 |
| 158 | PHE | 60.2 | 38.7 | 176.7 |
| 159 | ILE | 63.4 | 35.7 | 177.1 |
| 160 | LYS | 58.8 | 31.4 | 178.1 |
| 161 | ILE | 64.2 | 37.0 | 177.8 |
| 162 | LEU | 57.2 | 40.8 | 178.4 |
| 163 | ARG | 58.0 | 29.6 | 178.3 |
| 164 | ASP | 56.0 | 40.4 | 177.9 |
| 165 | GLU | 56.7 | 29.2 | 177.6 |
| 166 | GLY | 45.6 |      | 175.2 |
| 167 | LEU | 57.2 | 41.2 | 177.9 |
| 168 | PHE | 59.6 | 37.3 | 177.2 |
| 169 | ASN | 54.9 | 37.7 | 177.4 |
| 170 | LEU | 56.9 | 41.2 | 177.8 |
| 171 | TYR | 59.3 | 37.8 | 176.6 |
| 172 | ARG | 57.4 | 29.3 | 177.6 |
| 173 | GLY | 45.3 |      | 174.5 |
| 174 | TRP | 57.6 | 29.0 | 176.7 |
| 175 | GLY | 45.7 |      | 174.2 |
| 176 | TRP | 58.0 | 29.0 | 176.8 |
| 177 | THR | 62.8 | 68.8 | 174.8 |
| 178 | ALA | 52.8 | 18.1 | 178.0 |
| 179 | ALA |      | 18.3 | 178.0 |
| 180 | ARG |      |      |       |
| 181 | ASN | 52.7 | 38.8 | 174.5 |
| 182 | ALA | 51.0 | 17.3 | 175.3 |
| 183 | PRO | 63.4 | 31.0 | 177.5 |
| 184 | GLY | 45.2 |      | 174.6 |
| 185 | SER | 58.9 | 63.2 | 174.7 |
| 186 | PHE | 58.2 | 38.4 | 175.8 |
| 187 | ALA | 52.7 | 18.3 | 178.0 |
| 188 | LEU | 55.9 | 41.5 | 177.0 |
| 189 | PHE | 57.3 | 38.4 | 176.2 |
| 190 | GLY | 45.4 |      | 174.7 |
| 191 | GLY | 45.2 |      | 174.1 |
| 192 | ASN | 53.6 | 38.7 | 175.3 |
| 193 | ALA | 53.6 | 18.2 | 178.4 |
| 194 | PHE | 58.9 | 38.4 | 176.4 |
| 195 | ALA | 53.7 | 18.1 | 178.5 |
| 196 | LYS | 59.3 | 31.6 | 177.6 |
| 197 | GLU | 58.7 | 28.6 | 178.9 |
| 198 | TYR | 60.4 | 38.0 | 177.5 |
| 199 | ILE | 63.2 | 36.7 | 177.5 |
| 200 | LEU | 56.8 | 40.2 | 179.2 |
| 201 | GLY | 45.8 |      | 175.4 |
| 202 | LEU | 56.1 | 41.0 | 178.1 |
| 203 | LYS | 58.1 | 31.7 | 177.2 |

|     |     |      |      |       |
|-----|-----|------|------|-------|
| 204 | ASP | 55.2 | 40.2 | 177.4 |
| 205 | TYR | 59.1 | 37.7 | 176.8 |
| 206 | SER | 59.6 | 63.1 | 174.7 |
| 207 | GLN | 55.8 | 28.4 | 176.1 |
| 208 | ALA | 52.3 | 18.4 | 178.0 |
| 209 | THR | 62.6 | 69.0 | 175.2 |
| 210 | TRP |      |      |       |
| 211 | SER |      |      |       |
| 212 | GLN | 57.9 | 27.9 | 177.8 |
| 213 | ASN | 54.9 | 37.8 | 177.1 |
| 214 | PHE | 60.7 | 38.6 | 177.3 |
| 215 | ILE | 64.1 | 36.3 | 177.9 |
| 216 | SER | 61.7 | 62.0 | 177.8 |
| 217 | SER | 61.5 | 62.3 | 176.4 |
| 218 | ILE | 64.1 | 36.7 | 177.8 |
| 219 | VAL | 66.6 | 30.7 | 179.0 |
| 220 | GLY | 46.6 |      | 176.3 |
| 221 | ALA | 54.2 | 17.9 | 179.8 |
| 222 | CYS | 62.5 | 27.1 | 176.3 |
| 223 | SER | 61.4 | 62.4 | 175.8 |
| 224 | SER | 60.3 | 62.7 | 175.8 |
| 225 | LEU | 56.4 | 41.7 | 177.8 |
| 226 | ILE | 62.4 | 37.3 | 176.3 |
| 227 | VAL | 62.6 | 31.4 | 176.4 |
| 228 | SER | 58.5 | 63.4 | 173.8 |
| 229 | ALA | 50.7 | 17.7 | 175.6 |
| 230 | PRO | 63.1 | 30.0 | 177.4 |
| 231 | LEU | 57.2 | 40.6 | 178.3 |
| 232 | ASP | 56.9 | 39.8 | 178.7 |
| 233 | VAL | 65.0 | 31.2 | 178.1 |
| 234 | ILE | 64.4 | 37.1 | 177.3 |
| 235 | LYS | 59.8 | 31.6 | 178.4 |
| 236 | THR | 65.3 | 68.5 | 176.1 |
| 237 | ARG | 57.4 | 29.2 | 178.2 |
| 238 | ILE | 63.1 | 37.3 | 177.1 |
| 239 | GLN | 57.2 | 28.5 | 176.6 |
| 240 | ASN | 53.2 | 38.2 | 175.2 |
| 241 | ARG | 55.9 | 29.2 | 175.4 |
| 242 | ASN | 52.9 | 38.5 | 174.9 |
| 243 | PHE | 57.2 | 38.8 | 175.2 |
| 244 | ASP | 54.0 | 40.8 | 175.5 |
| 245 | ASN | 51.2 | 36.4 | 173.7 |
| 246 | PRO |      |      |       |
| 247 | GLU |      |      |       |
| 248 | SER |      |      |       |
| 249 | GLY | 46.3 |      | 174.8 |
| 250 | LEU | 56.7 | 40.8 | 178.2 |
| 251 | ARG | 58.6 | 29.1 | 177.9 |
| 252 | ILE | 63.4 | 37.0 | 178.8 |
| 253 | VAL | 65.7 | 30.9 | 177.2 |
| 254 | LYS | 59.4 | 31.5 | 178.0 |
| 255 | ASN | 54.9 | 37.5 | 177.4 |
| 256 | THR | 65.6 | 68.3 | 175.6 |

|     |     |      |      |       |
|-----|-----|------|------|-------|
| 257 | LEU | 56.4 | 40.7 | 177.1 |
| 258 | LYS | 56.7 | 31.8 | 176.9 |
| 259 | ASN | 54.0 | 39.0 | 176.1 |
| 260 | GLU | 57.7 | 29.4 | 177.8 |
| 261 | GLY | 45.6 |      | 175.4 |
| 262 | VAL | 65.4 | 31.2 | 177.6 |
| 263 | THR | 66.2 | 67.6 | 176.8 |
| 264 | ALA | 54.5 | 17.7 | 180.2 |
| 265 | PHE | 60.3 | 38.4 | 177.1 |
| 266 | PHE | 60.4 | 38.5 | 177.7 |
| 267 | LYS | 58.8 | 31.4 | 178.4 |
| 268 | GLY | 45.2 |      | 174.7 |
| 269 | LEU | 55.2 | 41.9 | 177.2 |
| 270 | THR | 64.4 | 67.8 | 173.6 |
| 271 | PRO | 64.8 | 30.7 | 178.4 |
| 272 | LYS | 57.3 | 31.4 | 178.3 |
| 273 | LEU | 56.5 | 41.4 | 177.6 |
| 274 | LEU | 55.7 | 41.1 | 177.5 |
| 275 | THR | 62.4 | 69.1 | 175.4 |
| 276 | THR | 62.8 | 69.1 | 175.1 |
| 277 | GLY | 46.1 |      | 172.2 |
| 278 | PRO |      |      |       |
| 279 | LYS | 57.2 | 31.6 | 177.6 |
| 280 | LEU | 55.8 | 41.3 | 177.4 |
| 281 | VAL | 63.4 | 29.3 | 176.2 |
| 282 | PHE | 58.6 | 38.5 | 175.5 |
| 283 | SER | 58.7 | 63.7 | 175.0 |
| 284 | PHE | 59.7 | 38.2 | 176.7 |
| 285 | ALA | 54.3 | 17.4 | 180.1 |
| 286 | LEU | 56.7 | 41.0 | 179.0 |
| 287 | ALA | 54.5 | 17.7 | 178.7 |
| 288 | GLN | 57.7 | 28.1 | 177.6 |
| 289 | SER | 59.8 | 62.8 | 175.1 |
| 290 | LEU | 55.6 | 42.3 | 177.1 |
| 291 | ILE | 63.2 | 35.8 | 174.7 |
| 292 | PRO | 64.2 | 30.8 | 177.8 |
| 293 | ARG | 56.6 | 29.1 | 178.0 |
| 294 | PHE | 59.6 | 38.4 | 176.5 |
| 295 | ASP | 56.8 | 39.9 | 178.3 |
| 296 | ASN | 55.3 | 38.1 | 177.3 |
| 297 | LEU | 57.6 | 41.0 | 178.3 |
| 298 | LEU | 57.4 | 40.1 | 179.4 |
| 299 | SER | 60.7 | 62.4 | 176.6 |
| 300 | LYS | 57.6 | 31.5 | 178.2 |



**Table S2.** Residue-specific dissociation constant ( $K_D$ ) for GDP and GTP

| #  | Residue | Presence of GDP |            | Presence of GTP |            |
|----|---------|-----------------|------------|-----------------|------------|
|    |         | $K_D$ (mM)      | <i>sdv</i> | $K_D$ (mM)      | <i>sdv</i> |
| 1  | MET     |                 |            |                 |            |
| 2  | PRO     |                 |            | 4.9             | 0.3        |
| 3  | HIS     | 31.2            | 3.7        | 10.3            | 1.0        |
| 4  | THR     | 8.5             | 0.8        | 3.3             | 0.0        |
| 5  | ASP     | 8.1             | 0.7        | 2.8             | 0.1        |
| 6  | LYS     | 6.3             | 0.6        | 2.9             | 0.2        |
| 7  | LYS     | 10.8            | 0.9        | 3.6             | 0.2        |
| 8  | GLN     | 6.9             | 0.4        | 2.6             | 0.1        |
| 9  | SER     | 64.8            | 9.4        | 6.3             | 0.6        |
| 10 | GLY     | 19.2            | 3.8        | 6.8             | 0.9        |
| 11 | LEU     | 25.9            | 3.4        | 8.0             | 0.3        |
| 12 | ALA     | 36.3            | 5.1        | 6.0             | 0.3        |
| 13 | ARG     | 19.7            | 4.8        | 4.6             | 0.4        |
| 14 | LEU     | 22.6            | 3.5        | 7.3             | 0.5        |
| 15 | LEU     |                 |            | 11.8            | 0.6        |
| 16 | GLY     |                 |            |                 |            |
| 17 | SER     | 28.6            | 10.4       | 7.3             | 1.3        |
| 18 | ALA     |                 |            | 8.2             | 0.6        |
| 19 | SER     |                 |            |                 |            |
| 20 | ALA     |                 |            |                 |            |
| 21 | GLY     |                 |            |                 |            |
| 22 | ILE     |                 |            |                 |            |
| 23 | MET     | 16.5*           | 11.4       | 4.5*            | 0.8        |
| 24 | GLU     | 27.3*           | 2.0        | 5.6*            | 1.1        |
| 25 | ILE     | 10.7*           | 1.6        | 5.0*            | 0.8        |
| 26 | ALA     | 11.9*           | 1.0        | 4.0*            | 0.9        |
| 27 | VAL     | 16.1*           | 0.6        | 5.1*            | 0.3        |
| 28 | PHE     | 16.9*           | 1.8        | 4.8*            | 0.7        |
| 29 | HIS     |                 |            |                 |            |
| 30 | PRO     | 10.2*           | 1.2        | 2.6*            | 0.1        |
| 31 | VAL     | 19.7            | 2.5        | 7.2             | 0.7        |
| 32 | ASP     | 16.7            | 1.7        | 5.2             | 0.6        |
| 33 | THR     | 35.5            | 3.1        | 8.7             | 0.3        |
| 34 | ILE     | 52.7            | 5.0        | 18.1            | 0.7        |
| 35 | SER     | 33.0            | 6.7        | 12.1            | 1.2        |
| 36 | LYS     | 42.1            | 5.2        | 10.9            | 0.8        |
| 37 | ARG     | 54.7            | 5.5        | 13.0            | 0.6        |
| 38 | LEU     | 38.8            | 10.6       | 12.2            | 0.8        |
| 39 | MET     | 40.4            | 5.1        | 11.2            | 0.6        |
| 40 | SER     | 20.9            | 5.5        | 11.9            | 0.8        |
| 41 | ASN     | 71.5            | 12.7       | 22.6            | 2.0        |
| 42 | HIS     | 34.4            | 6.2        | 13.3            | 1.5        |
| 43 | THR     |                 |            | 10.0            | 0.6        |
| 44 | LYS     | 64.4            | 11.0       | 12.0            | 0.8        |
| 45 | ILE     | 57.5            | 10.0       | 10.5            | 0.7        |
| 46 | THR     |                 |            | 77.6            | 1.5        |
| 47 | SER     |                 |            | 5.5             | 1.3        |
| 48 | GLY     | 30.8            | 3.9        | 14.1            | 1.1        |
| 49 | GLN     | 20.6            | 3.6        | 11.6            | 1.6        |

|     |     |       |      |      |     |
|-----|-----|-------|------|------|-----|
| 50  | GLU | 12.5  | 3.7  | 17.5 | 2.0 |
| 51  | LEU | 31.8  | 2.6  | 10.9 | 2.2 |
| 52  | ASN | 79.2  | 10.2 | 12.9 | 1.1 |
| 53  | ARG | 37.2  | 6.0  | 21.3 | 2.1 |
| 54  | VAL | 14.4  | 2.9  | 11.7 | 2.1 |
| 55  | ILE |       |      |      |     |
| 56  | PHE |       |      | 12.9 | 5.1 |
| 57  | ARG | 183.0 | 12.9 | 24.4 | 1.5 |
| 58  | ASP | 46.4  | 26.3 | 13.9 | 2.1 |
| 59  | HIS | 63.8  | 11.0 | 12.8 | 0.9 |
| 60  | PHE | 72.6  | 13.5 | 15.4 | 1.1 |
| 61  | SER |       |      | 15.7 | 0.5 |
| 62  | GLU |       |      |      |     |
| 63  | PRO |       |      |      |     |
| 64  | LEU |       |      |      |     |
| 65  | GLY |       |      |      |     |
| 66  | LYS | 71.6  | 14.2 | 24.5 | 3.6 |
| 67  | ARG |       |      |      |     |
| 68  | LEU |       |      |      |     |
| 69  | PHE | 24.0  | 3.9  |      |     |
| 70  | THR |       |      | 4.0  | 1.3 |
| 71  | LEU | 12.8  | 3.4  | 8.0  | 2.5 |
| 72  | PHE |       |      |      |     |
| 73  | PRO | 12.0  | 0.9  | 6.8  | 0.3 |
| 74  | GLY | 18.3  | 1.8  | 6.5  | 0.3 |
| 75  | LEU | 23.9  | 4.6  | 7.6  | 1.1 |
| 76  | GLY | 31.4  | 3.6  | 7.1  | 0.8 |
| 77  | TYR | 9.7   | 0.7  | 4.0  | 0.6 |
| 78  | ALA | 22.4  | 4.9  | 7.2  | 0.7 |
| 79  | ALA | 24.1  | 2.4  | 7.9  | 0.3 |
| 80  | SER | 17.4  | 3.1  | 8.8  | 0.5 |
| 81  | TYR | 56.4  | 3.9  | 9.5  | 1.4 |
| 82  | LYS | 18.6  | 4.5  | 6.0  | 2.0 |
| 83  | VAL | 14.5  | 1.5  | 8.3  | 0.2 |
| 84  | LEU | 15.7* | 1.4  | 7.5* | 0.3 |
| 85  | GLN | 16.0* | 2.6  | 7.8* | 0.5 |
| 86  | ARG | 15.4* | 1.8  | 5.8* | 0.2 |
| 87  | VAL | 15.0* | 2.6  | 6.4* | 0.3 |
| 88  | TYR | 7.2*  | 1.6  | 5.0* | 0.7 |
| 89  | LYS | 24.3* | 2.3  | 6.5* | 0.3 |
| 90  | TYR | 19.1* | 2.0  | 6.5* | 0.5 |
| 91  | GLY | 15.9* | 1.5  | 6.1* | 0.2 |
| 92  | GLY | 22.0* | 2.9  | 6.5* | 0.3 |
| 93  | GLN | 31.0* | 4.2  | 6.7* | 1.2 |
| 94  | PRO | 30.0  | 3.0  | 9.2  | 0.5 |
| 95  | PHE | 23.0  | 2.7  | 9.8  | 2.0 |
| 96  | ALA | 37.5  | 4.7  | 4.5  | 0.5 |
| 97  | ASN | 35.3  | 8.6  | 9.1  | 1.1 |
| 98  | GLU | 37.4  | 5.5  | 12.4 | 0.7 |
| 99  | PHE | 39.1  | 3.0  | 11.9 | 0.5 |
| 100 | LEU | 25.8  | 7.3  | 7.4  | 2.0 |
| 101 | ASN | 34.3  | 2.7  | 9.9  | 0.9 |
| 102 | LYS | 40.7  | 6.1  | 9.3  | 0.4 |

|     |     |       |      |       |     |
|-----|-----|-------|------|-------|-----|
| 103 | HIS | 32.5  | 3.9  | 6.5   | 0.9 |
| 104 | TYR | 30.6  | 5.9  | 9.9   | 2.1 |
| 105 | LYS | 47.6  | 5.5  | 12.4  | 0.5 |
| 106 | LYS | 41.2  | 9.2  | 10.7  | 0.9 |
| 107 | ASP | 25.5  | 9.2  | 10.3  | 0.7 |
| 108 | PHE | 13.1  | 2.9  | 11.2  | 0.7 |
| 109 | ASP | 10.0  | 2.9  | 4.2   | 0.6 |
| 110 | ASN | 45.1  | 16.7 | 9.7   | 0.5 |
| 111 | LEU | 25.0  | 3.2  | 16.9  | 1.4 |
| 112 | PHE |       |      | 29.3  | 3.5 |
| 113 | GLY | 29.2  | 3.7  | 10.9  | 1.1 |
| 114 | GLU | 37.2  | 5.1  | 13.5  | 1.0 |
| 115 | LYS | 36.3  | 5.1  | 23.2  | 1.9 |
| 116 | THR | 31.7  | 4.2  | 7.0   | 0.3 |
| 117 | GLY | 31.9  | 5.1  | 7.0   | 0.3 |
| 118 | LYS | 36.4  | 7.4  | 6.3   | 0.5 |
| 119 | ALA | 10.2  | 2.2  | 8.6   | 1.9 |
| 120 | MET |       |      | 21.6  | 0.7 |
| 121 | ARG |       |      | 16.0  | 2.1 |
| 122 | SER | 12.6  | 7.6  | 6.0   | 1.4 |
| 123 | ALA | 7.5   | 1.5  | 10.0  | 1.9 |
| 124 | ALA |       |      | 16.9  | 1.2 |
| 125 | ALA |       |      | 10.8  | 2.5 |
| 126 | GLY | 35.5  | 5.1  | 11.9  | 1.0 |
| 127 | SER |       |      |       |     |
| 128 | LEU | 19.4* | 3.1  | 12.3* | 2.5 |
| 129 | ILE | 46.9* | 4.8  | 11.8* | 3.1 |
| 130 | GLY | 49.2* | 5.1  | 14.3* | 2.4 |
| 131 | ILE |       |      |       |     |
| 132 | GLY | 10.8* | 2.1  | 8.1*  | 1.1 |
| 133 | GLU |       |      | 6.4*  | 0.8 |
| 134 | ILE | 20.4* | 4.0  | 7.0*  | 3.7 |
| 135 | VAL |       |      |       |     |
| 136 | LEU |       |      | 4.1   | 1.0 |
| 137 | LEU |       |      |       |     |
| 138 | PRO |       |      |       |     |
| 139 | LEU |       |      |       |     |
| 140 | ASP | 47.2  | 4.3  | 25.0  | 5.0 |
| 141 | VAL | 18.5  | 3.4  | 4.6   | 0.8 |
| 142 | LEU | 48.1  | 5.1  | 12.0  | 0.3 |
| 143 | LYS | 32.3  | 7.6  | 9.3   | 1.4 |
| 144 | ILE | 34.1  | 4.9  | 8.4   | 0.4 |
| 145 | LYS | 41.7  | 4.7  | 9.6   | 0.6 |
| 146 | ARG |       |      |       |     |
| 147 | GLN |       |      |       |     |
| 148 | THR |       |      |       |     |
| 149 | ASN |       |      |       |     |
| 150 | PRO | 57.8  | 9.8  | 8.7   | 0.8 |
| 151 | GLU | 30.0  | 2.4  | 7.7   | 0.6 |
| 152 | SER |       |      | 12.3  | 0.6 |
| 153 | PHE | 45.1  | 2.8  | 2.5   | 0.7 |
| 154 | LYS | 18.9  | 4.2  | 2.3   | 0.5 |
| 155 | GLY | 25.1  | 2.5  | 6.7   | 0.3 |

|     |     |       |      |      |     |
|-----|-----|-------|------|------|-----|
| 156 | ARG | 35.0  | 4.5  | 6.6  | 0.4 |
| 157 | GLY |       |      | 5.8  | 0.7 |
| 158 | PHE | 37.0  | 4.5  | 4.8  | 0.4 |
| 159 | ILE | 39.8  | 5.4  | 7.4  | 1.2 |
| 160 | LYS |       |      | 4.3  | 0.7 |
| 161 | ILE | 48.0  | 3.7  | 8.4  | 0.5 |
| 162 | LEU | 39.8  | 13.0 | 6.4  | 0.4 |
| 163 | ARG | 51.5  | 8.6  | 14.5 | 0.7 |
| 164 | ASP | 51.7  | 11.9 | 11.5 | 1.5 |
| 165 | GLU | 54.0  | 15.7 | 10.9 | 3.0 |
| 166 | GLY | 29.2  | 7.4  | 9.8  | 1.1 |
| 167 | LEU | 54.1  | 10.7 | 10.3 | 0.6 |
| 168 | PHE | 23.5  | 3.0  | 10.3 | 0.9 |
| 169 | ASN | 29.1  | 7.2  | 11.7 | 1.1 |
| 170 | LEU | 54.6  | 5.5  | 19.8 | 1.9 |
| 171 | TYR | 46.8  | 5.8  | 18.1 | 1.1 |
| 172 | ARG |       |      |      |     |
| 173 | GLY | 56.2  | 7.4  | 7.8  | 0.8 |
| 174 | TRP |       |      |      |     |
| 175 | GLY |       |      |      |     |
| 176 | TRP | 12.4* | 2.0  | 5.1* | 2.0 |
| 177 | THR | 29.2* | 4.5  | 7.4* | 0.7 |
| 178 | ALA | 28.7* | 12.1 | 5.5* | 0.9 |
| 179 | ALA | 14.0* | 2.7  | 6.1* | 1.7 |
| 180 | ARG |       |      |      |     |
| 181 | ASN | 27.9* | 1.9  | 1.6* | 0.7 |
| 182 | ALA | 40.8* | 3.8  | 1.9* | 0.6 |
| 183 | PRO |       |      |      |     |
| 184 | GLY | 11.9* | 1.6  | 3.4* | 0.6 |
| 185 | SER | 47.2* | 5.4  | 4.0* | 0.5 |
| 186 | PHE | 6.0*  | 0.5  | 3.0* | 0.6 |
| 187 | ALA | 7.4*  | 0.9  | 3.4  | 0.9 |
| 188 | LEU |       |      | 3.1  | 0.5 |
| 189 | PHE |       |      |      |     |
| 190 | GLY |       |      |      |     |
| 191 | GLY |       |      |      |     |
| 192 | ASN |       |      | 12.7 | 1.0 |
| 193 | ALA |       |      |      |     |
| 194 | PHE |       |      |      |     |
| 195 | ALA | 44.7  | 14.7 | 15.6 | 1.8 |
| 196 | LYS |       |      |      |     |
| 197 | GLU |       |      |      |     |
| 198 | TYR |       |      |      |     |
| 199 | ILE |       |      | 19.6 | 2.1 |
| 200 | LEU |       |      | 5.7  | 1.4 |
| 201 | GLY |       |      |      |     |
| 202 | LEU |       |      | 23.0 | 1.5 |
| 203 | LYS |       |      | 11.4 | 4.2 |
| 204 | ASP |       |      | 5.3  | 1.8 |
| 205 | TYR |       |      | 11.3 | 1.0 |
| 206 | SER |       |      |      |     |
| 207 | GLN |       |      |      |     |
| 208 | ALA |       |      |      |     |

|     |     |       |      |       |      |
|-----|-----|-------|------|-------|------|
| 209 | THR |       |      |       |      |
| 210 | TRP |       |      |       |      |
| 211 | SER |       |      |       |      |
| 212 | GLN |       |      | 3.5   | 0.3  |
| 213 | ASN |       |      |       |      |
| 214 | PHE |       |      |       |      |
| 215 | ILE |       |      |       |      |
| 216 | SER |       |      |       |      |
| 217 | SER |       |      |       |      |
| 218 | ILE |       |      |       |      |
| 219 | VAL |       |      |       |      |
| 220 | GLY |       |      |       |      |
| 221 | ALA |       |      |       |      |
| 222 | CYS |       |      |       |      |
| 223 | SER |       |      |       |      |
| 224 | SER |       |      |       |      |
| 225 | LEU |       |      |       |      |
| 226 | ILE |       |      |       |      |
| 227 | VAL |       |      |       |      |
| 228 | SER |       |      | 2.7*  | 0.8  |
| 229 | ALA |       |      | 10.8* | 2.6  |
| 230 | PRO |       |      | 6.5*  | 0.3  |
| 231 | LEU | 41.2* | 5.7  | 13.4* | 3.1  |
| 232 | ASP | 139.0 | 10.2 | 60.7  | 0.8  |
| 233 | VAL | 180.0 | 20.4 | 38.1  | 8.8  |
| 234 | ILE | 54.0  | 16.4 | 15.9  | 3.4  |
| 235 | LYS | 120.0 | 16.0 | 40.5  | 3.1  |
| 236 | THR | 112.0 | 12.2 | 36.1  | 2.0  |
| 237 | ARG | 198.0 | 25.8 | 67.9  | 6.0  |
| 238 | ILE | 146.0 | 29.9 | 36.6  | 3.3  |
| 239 | GLN | 142.0 | 18.2 | 50.5  | 10.3 |
| 240 | ASN | 603.0 | 30.1 | 20.2  | 3.9  |
| 241 | ARG |       |      | 40.5  | 6.4  |
| 242 | ASN |       |      | 13.0  | 1.5  |
| 243 | PHE |       |      |       |      |
| 244 | ASP |       |      |       |      |
| 245 | ASN |       |      |       |      |
| 246 | PRO |       |      |       |      |
| 247 | GLU |       |      |       |      |
| 248 | SER |       |      |       |      |
| 249 | GLY |       |      |       |      |
| 250 | LEU | 24.8  | 5.1  | 57.9  | 1.9  |
| 251 | ARG |       |      |       |      |
| 252 | ILE |       |      |       |      |
| 253 | VAL |       |      |       |      |
| 254 | LYS | 8.8   | 31.2 | 11.9  | 2.6  |
| 255 | ASN | 39.0  | 3.4  | 11.2  | 0.8  |
| 256 | THR | 33.6  | 2.7  | 11.5  | 0.5  |
| 257 | LEU | 59.7  | 9.6  | 15.7  | 0.7  |
| 258 | LYS | 80.2  | 16.8 | 9.7   | 1.5  |
| 259 | ASN |       |      | 13.3  | 0.9  |
| 260 | GLU | 99.1  | 28.9 | 15.8  | 2.2  |
| 261 | GLY | 54.0  | 11.6 | 14.2  | 0.9  |

|     |     |       |      |       |     |
|-----|-----|-------|------|-------|-----|
| 262 | VAL | 55.2  | 8.6  | 18.5  | 3.1 |
| 263 | THR | 48.3  | 7.1  | 19.9  | 1.5 |
| 264 | ALA | 66.1  | 10.6 | 20.8  | 2.8 |
| 265 | PHE | 46.3  | 9.4  | 40.6  | 1.7 |
| 266 | PHE | 48.5  | 13.8 | 32.5  | 1.4 |
| 267 | LYS | 67.9  | 6.6  | 32.9  | 1.5 |
| 268 | GLY | 91.9  | 12.0 | 18.0  | 2.0 |
| 269 | LEU | 81.2  | 6.0  | 26.6  | 1.8 |
| 270 | THR |       |      |       |     |
| 271 | PRO | 40.0  | 6.3  | 16.7  | 0.8 |
| 272 | LYS | 68.8  | 8.3  | 14.5  | 1.0 |
| 273 | LEU |       | 3.4  | 8.8   | 1.2 |
| 274 | LEU | 34.2  | 7.8  | 10.4  | 4.3 |
| 275 | THR |       |      |       |     |
| 276 | THR | 51.7* | 5.4  | 7.7*  | 0.6 |
| 277 | GLY |       |      | 3.2*  |     |
| 278 | PRO |       |      |       |     |
| 279 | LYS | 24.8* | 1.9  | 20.1* | 1.7 |
| 280 | LEU |       |      | 8.9*  | 1.8 |
| 281 | VAL |       |      | 2.5*  | 2.4 |
| 282 | PHE | 27.4* | 2.3  | 6.1*  | 0.0 |
| 283 | SER | 39.0  | 3.6  | 7.8   | 0.5 |
| 284 | PHE | 13.2  | 3.8  | 8.9   | 2.0 |
| 285 | ALA |       |      | 11.0  | 0.6 |
| 286 | LEU |       |      | 5.3   | 0.4 |
| 287 | ALA |       |      |       |     |
| 288 | GLN | 29.1  | 4.1  | 9.3   | 3.6 |
| 289 | SER |       |      |       |     |
| 290 | LEU |       |      | 5.0   | 0.9 |
| 291 | ILE |       |      | 7.6   | 0.5 |
| 292 | PRO |       |      |       |     |
| 293 | ARG | 8.9   | 2.1  | 3.2   | 1.1 |
| 294 | PHE | 9.9   | 1.0  | 6.2   | 0.3 |
| 295 | ASP | 28.0  | 3.6  | 11.0  | 0.3 |
| 296 | ASN | 14.9  | 2.2  | 7.8   | 0.7 |
| 297 | LEU | 15.3  | 1.9  | 5.1   | 0.3 |
| 298 | LEU | 17.5  | 3.8  | 6.1   | 0.4 |
| 299 | SER | 16.0  | 2.7  | 5.9   | 0.4 |
| 300 | LYS | 13.6  | 1.5  | 5.2   | 0.2 |

**Table S3.** Experimental internuclear RDCs couplings of GGC in presence and absence of GTP

| #  | Residue | Absence of GTP     |                      |                     | Presence of GTP    |                      |                     |
|----|---------|--------------------|----------------------|---------------------|--------------------|----------------------|---------------------|
|    |         | $^1D_{NH}$<br>(Hz) | $^1D_{C'Ca}$<br>(Hz) | $^1D_{NC'}$<br>(Hz) | $^1D_{NH}$<br>(Hz) | $^1D_{C'Ca}$<br>(Hz) | $^1D_{NC'}$<br>(Hz) |
| 1  | MET     |                    |                      |                     |                    |                      |                     |
| 2  | PRO     |                    |                      |                     |                    |                      |                     |
| 3  | HIS     |                    |                      |                     |                    |                      |                     |
| 4  | THR     |                    | -1.20                |                     |                    | -0.88                |                     |
| 5  | ASP     | 5.2                | 3.42                 | -2.32               | 3.1                | 1.98                 | -1.5                |
| 6  | LYS     | -22.3              |                      | 0.82                | -13.0              | -2.72                | 0.56                |
| 7  | LYS     | 0.2                | -3.55                |                     | -1.0               | -7.21                | 2.48                |
| 8  | GLN     | 4.2                | 1.42                 | -0.78               | 14.2               | 1.19                 | -0.8                |
| 9  | SER     | 42.6               | -3.81                | -2.47               | 21.1               |                      | -1.31               |
| 10 | GLY     |                    |                      | 1.06                | 16.9               | -5.36                | 1.6                 |
| 11 | LEU     | 2.2                |                      | 0.97                | 10.0               | 3.11                 | 0.91                |
| 12 | ALA     |                    |                      |                     | -16.8              | 2.99                 | -2.24               |
| 13 | ARG     | 6.7                |                      | 0.29                | 7.7                | -2.29                | 0.25                |
| 14 | LEU     |                    | -0.59                |                     | 12.4               | -0.07                | 0.52                |
| 15 | LEU     | -5.9               |                      | 2.16                | -15.0              | 2.32                 | 2.95                |
| 16 | GLY     | -6.0               |                      |                     | -10.9              | 1.84                 | -3.03               |
| 17 | SER     | 12.4               |                      |                     | 8.1                |                      | 0.21                |
| 18 | ALA     |                    |                      |                     | 2.5                | 1.19                 | 0.78                |
| 19 | SER     | -28.1              |                      | -0.26               | -25.3              | 4.56                 | -0.34               |
| 20 | ALA     | -16.2              | -2.86                | -1.56               | -17.3              | -4.30                | -1.04               |
| 21 | GLY     | 13.7               |                      | 1.98                | 2.3                | 2.10                 | 1.73                |
| 22 | ILE     |                    |                      |                     |                    |                      |                     |
| 23 | MET     |                    | -0.44                |                     |                    |                      | -0.47               |
| 24 | GLU     | 1.8                |                      | -0.07               |                    |                      |                     |
| 25 | ILE     | 6.3                | -3.60                |                     |                    | -0.55                |                     |
| 26 | ALA     |                    | 2.81                 | 0.21                |                    | 1.47                 | 0.51                |
| 27 | VAL     | -26.2              | -3.29                | -0.11               | -19.1              | -2.86                | 0.5                 |
| 28 | PHE     | 5.0                | -3.42                | 0.99                | -3.3               | -2.89                | 1.13                |
| 29 | HIS     | -28.3              |                      |                     | -17.7              |                      |                     |
| 30 | PRO     |                    | -2.00                |                     |                    | -0.44                |                     |
| 31 | VAL     | -6.7               | 0.00                 | -0.04               | -15.4              |                      | 0.31                |
| 32 | ASP     | -23.3              | -0.85                | 2.74                | -10.7              | 0.66                 | 1.7                 |
| 33 | THR     | -26.4              |                      | -0.91               | -16.8              | 2.26                 | -0.44               |
| 34 | ILE     | -22.3              | -2.25                | 0.85                | -13.7              | -1.85                | 0.31                |
| 35 | SER     | -19.6              | -0.68                | -0.12               | -6.2               | -1.58                | 0.64                |
| 36 | LYS     |                    | 0.16                 | 1.32                | -9.9               | 0.14                 | 1.1                 |
| 37 | ARG     | -23.3              | -0.80                | 1.60                | -15.3              | 1.61                 | 0                   |
| 38 | LEU     | -13.4              | -0.84                | -0.48               | -6.5               | -1.25                | -0.12               |
| 39 | MET     | -11.3              | -0.73                | 1.75                | 0.7                | -1.57                | 1.31                |
| 40 | SER     | -6.6               | 1.63                 | -0.39               | -3.4               | 1.17                 | -0.04               |
| 41 | ASN     | 0.1                |                      | -0.17               | 0.2                |                      | -0.54               |
| 42 | HIS     |                    | 1.45                 |                     |                    |                      |                     |
| 43 | THR     | 1.5                | 2.06                 | -0.17               |                    | 1.44                 |                     |
| 44 | LYS     | 0.1                | -0.13                | 0.53                | -0.2               | -0.52                | 0.51                |
| 45 | ILE     | 5.3                | 2.05                 | -0.53               | 3.8                | 2.00                 | -0.64               |
| 46 | THR     | -2.4               | 0.26                 | 0.34                | -0.5               | -0.20                | 0.34                |
| 47 | SER     | -0.1               | 0.56                 | 0.23                | 1.1                | 0.34                 | -0.32               |
| 48 | GLY     | -1.9               | 1.60                 | 0.01                | -0.6               | 1.30                 | -0.16               |

|     |     |       |       |       |       |       |       |
|-----|-----|-------|-------|-------|-------|-------|-------|
| 49  | GLN | -1.1  | -0.34 | -0.17 | 0.3   | -0.29 | -0.35 |
| 50  | GLU | 2.2   | -0.49 | 0.16  | 2.6   | -1.30 | 0.36  |
| 51  | LEU | 3.9   | -2.28 | 0.34  | -0.9  | 0.79  | 0.27  |
| 52  | ASN | 1.3   | 3.26  | -0.04 | -4.0  | -0.21 | -0.01 |
| 53  | ARG | -1.1  | 2.95  | -0.65 | -1.5  | -0.03 | -0.68 |
| 54  | VAL | 0.8   |       | 0.39  | 1.0   |       | 0.36  |
| 55  | ILE |       |       |       |       |       |       |
| 56  | PHE |       | 2.06  |       |       | 0.98  |       |
| 57  | ARG | -1.2  | 0.57  | -0.02 | 0.1   | 0.31  | -0.21 |
| 58  | ASP | -2.4  |       | 0.20  | -1.5  | 0.00  | 0.17  |
| 59  | HIS | -3.9  | 0.26  |       | -1.2  | -3.13 | 0.03  |
| 60  | PHE | 0.2   | 0.11  | -0.66 |       | 0.20  | -0.38 |
| 61  | SER | -9.6  |       | 0.20  | -0.7  |       | 0.52  |
| 62  | GLU | -5.8  |       | -0.06 |       |       |       |
| 63  | PRO |       |       |       |       |       |       |
| 64  | LEU |       |       |       |       |       |       |
| 65  | GLY | 6.5   |       |       | -4.3  |       |       |
| 66  | LYS | -2.7  |       | 0.78  | -9.5  |       | 1.19  |
| 67  | ARG | -8.1  |       | -0.59 | -8.1  |       | -1.26 |
| 68  | LEU | 1.2   |       | 2.19  | -0.5  | -2.17 | 1.28  |
| 69  | PHE | 6.9   |       | 0.17  | -0.3  |       | -0.03 |
| 70  | THR | -25.1 | 1.25  |       | -14.5 | 1.01  | 0.07  |
| 71  | LEU | -4.3  | -1.70 | -0.80 | -3.6  | -1.45 | 0.25  |
| 72  | PHE | 3.9   |       | 0.84  | 0.3   |       | 0.53  |
| 73  | PRO |       | -2.23 |       |       | -0.55 |       |
| 74  | GLY | -0.9  | 1.84  | 1.46  | -0.7  | 1.93  | 0.73  |
| 75  | LEU | -3.1  |       |       | -5.8  | 1.50  | -1.64 |
| 76  | GLY | 13.0  |       |       | 7.4   |       | 0.12  |
| 77  | TYR |       | -1.11 |       |       | -3.09 |       |
| 78  | ALA | 1.3   |       | -0.64 | 3.4   |       | -0.61 |
| 79  | ALA | 21.5  |       |       | 17.3  |       | 1.69  |
| 80  | SER |       | 3.99  |       | 20.7  | 0.73  |       |
| 81  | TYR | -2.3  | 0.44  | 1.30  | -5.3  |       | 0.81  |
| 82  | LYS | -6.4  |       | 0.17  |       |       |       |
| 83  | VAL |       |       |       | 20.6  |       | -1.3  |
| 84  | LEU |       |       |       |       |       | 1.29  |
| 85  | GLN |       |       |       | 17.5  |       |       |
| 86  | ARG |       |       |       | 20.1  |       | 1.9   |
| 87  | VAL |       |       |       | 21.9  |       |       |
| 88  | TYR |       |       |       |       |       |       |
| 89  | LYS |       |       |       |       |       |       |
| 90  | TYR |       |       |       |       |       |       |
| 91  | GLY |       | 6.31  |       | 16.5  | 1.72  |       |
| 92  | GLY | -12.9 | 0.39  | -2.18 | -7.0  | 0.20  | -1.02 |
| 93  | GLN | 1.5   |       | -0.35 | -6.8  |       | 0.23  |
| 94  | PRO |       |       |       |       |       |       |
| 95  | PHE | -10.1 |       | 0.57  | -8.4  |       | 0.84  |
| 96  | ALA |       | -1.59 |       |       | 0.50  | -0.22 |
| 97  | ASN | -24.0 |       | 0.30  | -10.2 | 0.33  | 0.44  |
| 98  | GLU | -6.7  | -0.65 | 0.94  | -11.1 |       | -0.09 |
| 99  | PHE | -8.5  | -0.28 | 1.95  |       |       |       |
| 100 | LEU | -9.2  |       | -0.53 |       |       |       |
| 101 | ASN | -6.0  | 2.62  | 0.20  |       |       |       |



|     |     |      |       |       |      |       |       |
|-----|-----|------|-------|-------|------|-------|-------|
| 102 | LYS | 2.8  |       | -0.64 | -3.7 |       | -0.13 |
| 103 | HIS | -8.8 |       |       |      | 0.08  |       |
| 104 | TYR | 0.7  | 0.13  | 0.16  | -1.3 | -0.14 | -0.46 |
| 105 | LYS | -8.5 | 2.60  | -0.02 | -5.0 |       | -0.52 |
| 106 | LYS | 8.4  | -0.42 | 0.29  |      | -0.57 |       |
| 107 | ASP | -5.1 | -0.25 | 0.47  | 2.5  | -0.43 | 0.31  |
| 108 | PHE | -0.5 | 1.06  | 0.84  | -1.2 | 0.03  | 1.07  |
| 109 | ASP | -6.5 | 0.64  | -1.06 | -2.6 | 1.35  | -0.88 |
| 110 | ASN | -0.8 | -0.46 | 0.68  | -0.9 | -1.74 | 0.52  |
| 111 | LEU | -0.8 | 1.97  | -0.10 | 0.9  | 3.03  | -0.2  |
| 112 | PHE | 1.9  | -0.59 | -0.03 | 2.9  | -0.60 | 0.18  |
| 113 | GLY | 3.4  | 1.06  | -0.71 | 3.2  | 1.13  | -0.83 |
| 114 | GLU | 0.8  | 1.88  | -0.71 | -0.9 | 0.35  | -0.64 |
| 115 | LYS | 5.2  | 0.04  | 0.64  | 4.3  | -0.85 | 0.3   |
| 116 | THR | 10.7 | 1.04  | -0.57 | 7.2  | 0.52  | -0.54 |
| 117 | GLY | 2.6  | 1.84  | 0.60  | 1.3  | 1.49  | 0.35  |
| 118 | LYS | 0.8  |       | -1.64 | -0.1 |       | -1.14 |
| 119 | ALA | 8.0  |       | 0.85  | 6.2  |       | 0.34  |
| 120 | MET | 5.2  | 2.04  | -0.01 | 1.9  | 1.29  | 0.22  |
| 121 | ARG | 2.7  |       | -1.55 | 0.8  |       |       |
| 122 | SER | 1.7  | 1.21  | -0.80 | 3.6  |       | 0.05  |
| 123 | ALA | 6.8  | -0.63 | -0.32 | 3.8  | -2.26 | -0.25 |
| 124 | ALA | 1.9  | 1.86  | 0.89  | 0.0  | 1.37  | 0.54  |
| 125 | ALA | -2.7 | 0.70  | -0.33 | -3.1 | 0.40  | -1.16 |
| 126 | GLY | 1.7  | -1.39 | 0.19  | 1.4  | -1.73 | 0.07  |
| 127 | SER | 3.5  | -0.12 | 0.05  | 1.5  | -0.50 | 0.05  |
| 128 | LEU | -7.3 | 0.63  | 0.50  | -4.8 | -0.26 | 0.29  |
| 129 | ILE | -6.2 | 0.26  | -0.53 | 10.5 | 0.10  | 1.31  |
| 130 | GLY | -2.8 | -0.35 | 0.36  | -2.0 | -0.54 | 0.21  |
| 131 | ILE | -4.4 | 0.13  | 0.40  | -1.0 | 0.10  | 0.54  |
| 132 | GLY | -9.1 | 0.79  | 0.23  | -6.7 | 0.74  | 0.05  |
| 133 | GLU | -5.6 | -0.47 | 0.09  | -4.0 | -0.15 | -0.02 |
| 134 | ILE | -0.9 | 3.81  | 0.56  | -2.3 |       | 0.52  |
| 135 | VAL | -9.2 |       |       | -7.2 |       |       |
| 136 | LEU |      | 1.42  |       |      | -0.80 |       |
| 137 | LEU | -2.2 |       | -0.13 | -2.9 |       | -0.17 |
| 138 | PRO |      |       |       |      |       |       |
| 139 | LEU | -5.2 | 0.94  |       |      | 0.97  |       |
| 140 | ASP | 2.7  |       | -0.96 | -2.3 | 1.43  | -0.04 |
| 141 | VAL |      | 0.43  |       | -4.6 | -0.23 | 0.65  |
| 142 | LEU | -0.8 | 0.67  | -0.02 | -1.6 |       | 0     |
| 143 | LYS | -2.3 | 1.08  | 0.18  |      |       |       |
| 144 | ILE | -2.3 | 0.13  | -0.38 | -2.2 |       | -0.18 |
| 145 | LYS | -0.7 |       | -0.13 | -0.7 |       |       |
| 146 | ARG |      |       |       |      |       |       |
| 147 | GLN |      |       |       |      |       |       |
| 148 | THR |      |       |       |      |       |       |
| 149 | ASN |      |       |       |      |       |       |
| 150 | PRO |      | 2.44  |       |      | 0.84  |       |
| 151 | GLU | 0.0  | 0.26  | -0.72 | -0.4 | 0.41  | -0.3  |
| 152 | SER | 0.5  | 1.16  | -0.16 | 0.9  | -0.12 | 0.1   |
| 153 | PHE | -1.0 | -0.11 |       | -1.6 |       |       |
| 154 | LYS | 2.7  | 1.73  | -0.74 | 2.7  | 1.08  |       |

|     |     |       |       |       |       |       |       |
|-----|-----|-------|-------|-------|-------|-------|-------|
| 155 | GLY | 0.0   | 0.19  | 0.34  |       | 0.01  | 0.08  |
| 156 | ARG | 1.6   | 1.05  | -0.64 | -0.8  | 0.65  | -0.39 |
| 157 | GLY | -1.0  | 2.08  | 0.58  | -0.7  |       | 0.38  |
| 158 | PHE | 4.6   |       | -0.46 | 5.2   | -0.76 | -0.07 |
| 159 | ILE | -1.6  |       | -0.45 | 2.0   |       | -0.53 |
| 160 | LYS | 1.3   | 1.39  | -0.36 | 1.6   | 0.24  | -0.41 |
| 161 | ILE | 9.5   |       | -0.40 | 5.1   |       | -0.54 |
| 162 | LEU | -1.1  |       |       | 3.2   |       | 0.37  |
| 163 | ARG |       |       |       |       |       |       |
| 164 | ASP |       |       |       |       |       |       |
| 165 | GLU |       |       |       |       |       |       |
| 166 | GLY | -9.3  | 3.63  | 0.73  |       | -3.43 |       |
| 167 | LEU | 0.4   |       | 1.21  | -24.3 |       | 1.8   |
| 168 | PHE | -21.7 |       |       | -3.3  | 0.79  | -1.04 |
| 169 | ASN | 0.4   | 2.40  | -0.17 | 0.2   | -0.66 | 0.34  |
| 170 | LEU | -1.5  | 0.57  | -0.26 | 0.9   | -2.28 | -0.63 |
| 171 | TYR | -2.3  | -1.04 | 0.47  | 0.2   | 1.42  | 0.61  |
| 172 | ARG | -7.6  | 0.54  | -0.61 | -1.0  | 1.53  | -0.72 |
| 173 | GLY | 4.2   | -3.14 | 0.48  | 2.6   | -0.88 | 0.13  |
| 174 | TRP | 2.1   | 2.59  | -0.38 | 2.4   | 0.98  | 0.03  |
| 175 | GLY | -0.3  | 0.13  | 0.08  | 1.3   | -0.17 | 0.14  |
| 176 | TRP | 0.7   | -0.75 | -0.03 | 0.5   | 0.06  | 0     |
| 177 | THR | -2.8  | -1.18 | 0.25  | -3.7  | 1.12  | 0.04  |
| 178 | ALA | -1.5  | -0.62 | -0.15 | -1.8  |       | 0.04  |
| 179 | ALA | -7.1  |       |       | -4.9  |       |       |
| 180 | ARG |       |       |       |       |       |       |
| 181 | ASN |       |       |       |       |       |       |
| 182 | ALA |       |       |       |       |       |       |
| 183 | PRO |       | 0.89  |       |       | 0.49  |       |
| 184 | GLY | -3.6  | 0.50  | 0.10  | -2.3  | 1.06  | -0.07 |
| 185 | SER | -1.1  | -0.21 | 0.16  | -0.4  | -0.02 | -0.06 |
| 186 | PHE | -2.5  | 0.20  | 0.39  | -1.7  | 0.19  | 0.25  |
| 187 | ALA | -3.4  | 0.10  | -0.12 | -2.9  | -0.26 | -0.1  |
| 188 | LEU | -5.6  | -0.24 | 0.44  | -2.1  | -0.05 | 0.21  |
| 189 | PHE | -0.6  | 0.88  | -0.01 | -0.5  | 0.34  | 0.02  |
| 190 | GLY | -3.2  | 0.25  | 0.01  | -1.6  | 0.16  | 0.06  |
| 191 | GLY | 0.8   | 0.04  | 0.07  | 0.5   | 0.10  | 0.04  |
| 192 | ASN | -1.6  | 0.24  | -0.14 | -1.4  | 0.19  | -0.14 |
| 193 | ALA | -0.1  | -0.64 | 0.33  | -1.2  | -1.94 | 0.16  |
| 194 | PHE | -3.5  | 1.00  | 0.48  | -2.4  | 0.08  | 1.5   |
| 195 | ALA | -0.2  |       | 0.06  | -2.0  | -1.11 | 0.2   |
| 196 | LYS |       | 0.49  |       | 0.0   | 0.21  | -0.06 |
| 197 | GLU | -1.4  | -0.43 | 0.37  | -0.8  | -1.22 | 0.23  |
| 198 | TYR | -1.3  | 0.29  | 0.09  | -1.0  | 0.22  | -0.01 |
| 199 | ILE | -1.1  |       | -0.28 | 1.1   |       | 0.32  |
| 200 | LEU |       | -0.19 |       |       | 0.38  |       |
| 201 | GLY | 1.3   | 0.32  | -0.89 | -0.2  | 0.31  | -0.54 |
| 202 | LEU | 1.4   | -0.12 | 0.41  | -0.4  | 0.52  | 0.27  |
| 203 | LYS | -2.6  | 1.78  | -0.06 | -1.0  | 1.82  | -0.47 |
| 204 | ASP | 0.2   | 0.89  | 0.05  | -2.0  | 0.28  | 0.11  |
| 205 | TYR | -0.9  | 0.39  | -0.39 | -0.3  | 0.66  | 0     |
| 206 | SER | 1.8   | -0.51 | -0.34 | 0.8   | 0.28  | -0.14 |
| 207 | GLN | 2.2   |       |       | -1.3  |       |       |

|     |     |       |       |       |      |       |       |
|-----|-----|-------|-------|-------|------|-------|-------|
| 208 | ALA |       |       |       |      |       |       |
| 209 | THR |       |       |       |      |       |       |
| 210 | TRP |       |       |       |      |       |       |
| 211 | SER |       |       |       |      |       |       |
| 212 | GLN |       | 0.83  |       |      | 1.70  |       |
| 213 | ASN | 18.0  |       | -0.80 | 6.0  |       | -0.12 |
| 214 | PHE | 24.5  | 0.84  | -1.04 |      | 0.57  | -0.3  |
| 215 | ILE | -5.2  |       | -0.87 | 0.2  |       | -0.37 |
| 216 | SER | 8.5   | 0.56  |       | 6.7  |       | -0.37 |
| 217 | SER | 28.1  |       | 1.23  |      |       |       |
| 218 | ILE | 6.7   |       |       | 4.5  | -0.95 | -0.54 |
| 219 | VAL | 5.8   | -3.71 | -0.49 | 9.1  | 0.05  | -0.62 |
| 220 | GLY | 12.6  | 0.29  | -1.41 | 9.8  | 0.18  | -0.15 |
| 221 | ALA | 19.6  |       | 0.73  | 9.3  |       | -0.29 |
| 222 | CYS | 6.1   |       |       | 5.1  | 0.40  | -0.22 |
| 223 | SER | 16.8  | 2.33  |       | 6.8  | 0.85  | -0.49 |
| 224 | SER | 13.3  | -1.41 | -1.26 | 11.1 | 0.03  | -0.39 |
| 225 | LEU | 6.0   | -1.04 | -0.24 | 7.9  | 0.35  | -0.68 |
| 226 | ILE | -1.3  | -3.40 | -1.23 | 5.4  |       | -0.39 |
| 227 | VAL | 6.2   | -0.45 |       | 3.9  | -0.19 |       |
| 228 | SER | 4.1   | 1.13  | -0.01 | 2.7  | 0.56  | -0.04 |
| 229 | ALA | 0.3   |       | -0.70 | 3.3  |       | -0.52 |
| 230 | PRO |       | -7.74 |       |      |       |       |
| 231 | LEU | -26.3 | -2.88 |       | -2.9 |       |       |
| 232 | ASP | 3.8   | -1.08 |       | -0.4 | -1.27 |       |
| 233 | VAL | 10.3  | -1.81 | -0.66 | 7.0  | -1.48 | -0.39 |
| 234 | ILE | 3.8   | 0.24  | 1.57  | 0.2  | 0.00  | 1.16  |
| 235 | LYS | -7.2  | 1.08  | -1.13 | -5.6 | 2.96  | -1.18 |
| 236 | THR | 0.3   | -1.39 | -0.95 | -3.0 | -1.39 | -0.44 |
| 237 | ARG | 22.6  | -2.07 | 0.42  | 14.5 | 0.16  | 0.57  |
| 238 | ILE | -3.3  | 3.13  | -0.24 | -2.2 | 1.76  | -0.32 |
| 239 | GLN | -2.9  | 0.89  | -0.35 | -4.0 | 1.78  | -0.3  |
| 240 | ASN | 3.6   | -1.00 | -0.91 | 1.2  | -0.87 | -0.51 |
| 241 | ARG | 9.0   | 1.13  | 0.41  | 1.0  | 0.53  | 0.53  |
| 242 | ASN | -6.1  | 0.91  | -0.30 | -4.7 | 0.52  | -0.24 |
| 243 | PHE | -1.8  | 0.87  | -0.35 | -2.9 | 0.29  | -0.22 |
| 244 | ASP | -2.1  | 1.90  | -0.15 | -3.7 | 0.55  | -0.07 |
| 245 | ASN | -6.1  |       |       | 1.7  |       |       |
| 246 | PRO |       |       |       |      |       |       |
| 247 | GLU |       |       |       |      |       |       |
| 248 | SER |       |       |       |      |       |       |
| 249 | GLY |       | 1.32  |       |      | 0.99  |       |
| 250 | LEU | 2.4   | -1.81 | -0.07 | 3.4  | -1.92 | -0.23 |
| 251 | ARG | 16.6  | -0.45 | 0.85  | 12.9 | -0.32 | 0.8   |
| 252 | ILE | -6.9  | 2.27  | -1.46 | -5.5 | 2.34  | -0.8  |
| 253 | VAL | 1.2   | -0.99 | -0.02 | 0.3  | -1.74 | 0.21  |
| 254 | LYS | 0.1   | -0.59 | 0.36  | 6.5  | -0.53 | -0.96 |
| 255 | ASN | 4.5   | 2.05  | 1.39  | 2.8  | -0.02 | 1.18  |
| 256 | THR | -16.3 | 0.67  | -1.88 | -2.3 | 1.39  | -1.79 |
| 257 | LEU | 4.9   | -0.85 | 0.91  | 2.9  | -2.92 | 0.18  |
| 258 | LYS | 20.6  | 0.25  | 0.08  | 3.7  | 0.17  | 0.38  |
| 259 | ASN | -6.7  | 0.67  | 0.29  | -2.0 | 0.80  | 0.05  |
| 260 | GLU | -5.2  | 2.12  | 0.60  | 3.9  | 1.30  | -0.56 |

|     |     |       |       |       |       |       |       |
|-----|-----|-------|-------|-------|-------|-------|-------|
| 261 | GLY | 7.2   | -0.81 | -0.59 | 4.8   | -0.84 | -0.58 |
| 262 | VAL | 1.2   | -0.59 | 0.40  | 4.4   | 0.45  | 0     |
| 263 | THR | 4.5   | 1.03  | -1.15 | 5.8   | 0.52  | -0.36 |
| 264 | ALA | 6.8   | -0.72 | 0.45  | 7.1   | -1.16 | 0.41  |
| 265 | PHE | 7.5   |       | -1.29 | 4.9   |       | -1.29 |
| 266 | PHE |       | -1.56 |       |       | -1.59 |       |
| 267 | LYS | 4.5   | 1.90  | -1.40 | 6.6   | 1.19  | -1.04 |
| 268 | GLY | 6.3   | -0.74 | 0.23  | 3.9   | -0.55 | 0.33  |
| 269 | LEU | 11.3  | 1.88  | -0.86 | 6.8   | 1.70  | -0.71 |
| 270 | THR | -3.5  |       | 0.28  | -0.6  |       | 0.31  |
| 271 | PRO |       | 0.57  |       |       | 0.63  |       |
| 272 | LYS | 8.5   | -0.46 | -0.06 | 5.8   | -1.57 | 0.19  |
| 273 | LEU | 15.0  | 0.78  | 0.08  | 6.0   | 0.37  | 0.22  |
| 274 | LEU | 5.2   |       | -0.46 | -1.6  |       | 0.06  |
| 275 | THR |       | 0.53  |       | 4.0   | 0.72  |       |
| 276 | THR | 2.1   | -0.98 | 0.71  | 2.3   | -1.15 | 0.28  |
| 277 | GLY | -2.7  |       | 0.31  | -0.5  |       | 0.3   |
| 278 | PRO |       |       |       |       |       |       |
| 279 | LYS |       |       |       |       | -0.07 |       |
| 280 | LEU | -3.3  |       | 1.26  | -1.0  |       | 0.39  |
| 281 | VAL | -9.6  |       | 0.72  | -8.0  |       | -0.02 |
| 282 | PHE |       | 3.96  |       |       | 1.30  |       |
| 283 | SER | -8.7  | -0.63 | -0.86 | -5.5  | -1.21 | -0.59 |
| 284 | PHE | -5.5  |       | 1.40  | -2.9  | -2.20 | 0.83  |
| 285 | ALA | -5.3  | 0.92  |       | -11.6 | 0.29  | 1.21  |
| 286 | LEU | -27.4 | 0.97  | -0.60 | -18.4 | -0.24 | -0.08 |
| 287 | ALA | -14.5 | -4.19 | 0.76  | -10.9 | -2.86 | 0.38  |
| 288 | GLN | -10.8 | -0.98 | 1.93  | -7.4  | -0.85 | 1.54  |
| 289 | SER | -31.9 | 0.39  | 1.13  | -16.0 | 1.35  | 0.68  |
| 290 | LEU | -22.2 | -0.31 | -0.30 | -16.3 | 0.15  | -0.11 |
| 291 | ILE | 2.7   |       | 1.83  | -0.1  |       | 0.92  |
| 292 | PRO |       |       |       |       | 3.09  |       |
| 293 | ARG |       |       |       | -14.6 | 2.65  | -0.55 |
| 294 | PHE | 3.9   |       | -0.91 | 0.0   | -0.65 | -0.66 |
| 295 | ASP | 20.0  |       | 1.67  | 7.5   | 0.04  | 0.96  |
| 296 | ASN |       |       |       | -0.5  | 3.67  | -0.55 |
| 297 | LEU | -11.7 | 3.59  |       | -9.7  | 2.49  | -3.13 |
| 298 | LEU | 17.5  | -6.35 | 2.31  | 8.1   |       | 1.61  |
| 299 | SER | 19.9  |       | -0.12 | 9.6   | 1.88  | -0.1  |
| 300 | LYS | -28.3 |       | 0.81  | -13.2 |       | 0.98  |

**Table S4.** Example of RDC-based Molecular Fragment Analysis <sup>a</sup>

| #  | sequence | $Q_{\text{free}}^b$ | <i>s.d.</i> | $Da^c$ | <i>s.d.</i> | $Rh^d$ | <i>s.d.</i> | $N^e$ | $GDO^f$<br>[ $\times 10^{-3}$ ] | <i>s.d.</i> | rmsd <sup>g</sup> |
|----|----------|---------------------|-------------|--------|-------------|--------|-------------|-------|---------------------------------|-------------|-------------------|
| 12 | SGLARLL  | 0.19                | 0.01        | 20.5   | 2.0         | 0.16   | 0.07        | 20    | 2.21                            | 0.23        | 0.172             |
| 13 | GLARLLG  | 0.17                | 0.01        | 19.1   | 0.9         | 0.16   | 0.04        | 21    | 2.06                            | 0.16        | 0.139             |
| 14 | LARLLGS  | 0.19                | 0.01        | 19.3   | 1.3         | 0.19   | 0.05        | 20    | 2.09                            | 0.30        | 0.203             |
| 15 | ARLLGSA  | 0.20                | 0.01        | 19.3   | 1.5         | 0.20   | 0.06        | 20    | 2.09                            | 0.21        | 0.220             |
| 16 | RLLGSAS  | 0.22                | 0.00        | 16.8   | 0.6         | 0.42   | 0.07        | 20    | 1.91                            | 0.13        | 0.162             |
| 17 | LLGSASA  | 0.17                | 0.01        | 19.4   | 1.8         | 0.51   | 0.08        | 20    | 2.26                            | 0.16        | 0.188             |
| 18 | LGSASAG  | 0.18                | 0.01        | 20.3   | 0.9         | 0.26   | 0.04        | 19    | 2.22                            | 0.18        | 0.178             |
| 19 | GSASAGI  | 0.14                | 0.01        | 16.4   | 0.8         | 0.38   | 0.05        | 17    | 1.84                            | 0.11        | 0.164             |
| 20 | SASAGIM  | 0.14                | 0.01        | 15.7   | 1.4         | 0.43   | 0.12        | 15    | 1.79                            | 0.28        | 0.178             |
| 21 | ASAGIME  | 0.10                | 0.01        | 18.3   | 1.7         | 0.22   | 0.12        | 13    | 1.99                            | 0.47        | 0.208             |
| 22 | SAGIMEI  | 0.05                | 0.01        | 17.4   | 1.4         | 0.34   | 0.12        | 11    | 1.93                            | 0.13        | 0.189             |
| 23 | AGIMEIA  | 0.06                | 0.01        | 18.2   | 2.2         | 0.25   | 0.13        | 10    | 1.99                            | 0.11        | 0.184             |
| 24 | GIMEIAV  | 0.05                | 0.01        | 14.4   | 4.4         | 0.15   | 0.08        | 10    | 1.56                            | 0.12        | 0.204             |
| 25 | IMEIAVF  | 0.08                | 0.01        | 13.5   | 0.8         | 0.20   | 0.02        | 11    | 1.46                            | 0.10        | 0.194             |
| 26 | MEIAVFH  | 0.06                | 0.01        | 13.5   | 0.8         | 0.19   | 0.02        | 11    | 1.46                            | 0.09        | 0.178             |
| 27 | EIAVFHP  | 0.07                | 0.01        | 13.3   | 0.7         | 0.18   | 0.02        | 11    | 1.44                            | 0.12        | 0.198             |
| 28 | IAVFHPV  | 0.13                | 0.01        | 11.4   | 0.5         | 0.30   | 0.07        | 13    | 1.26                            | 0.09        | 0.223             |
| 29 | AVFHPVD  | 0.16                | 0.01        | 10.6   | 0.4         | 0.37   | 0.07        | 15    | 1.19                            | 0.04        | 0.167             |
| 30 | VFHPVDT  | 0.16                | 0.01        | 10.8   | 0.6         | 0.49   | 0.09        | 16    | 1.25                            | 0.07        | 0.217             |
| 31 | FHPVDTI  | 0.16                | 0.01        | 9.9    | 0.4         | 0.40   | 0.07        | 16    | 1.12                            | 0.04        | 0.191             |
| 32 | HPVDTIS  | 0.12                | 0.01        | 9.4    | 0.2         | 0.37   | 0.02        | 16    | 1.06                            | 0.04        | 0.180             |
| 33 | PVDTISK  | 0.15                | 0.01        | 9.1    | 0.6         | 0.39   | 0.03        | 18    | 1.02                            | 0.09        | 0.195             |
| 34 | VDTISKR  | 0.16                | 0.01        | 8.5    | 0.2         | 0.43   | 0.03        | 20    | 0.96                            | 0.08        | 0.161             |
| 35 | DTISKRL  | 0.15                | 0.01        | 8.1    | 0.2         | 0.52   | 0.06        | 21    | 0.94                            | 0.06        | 0.147             |
| 36 | TISKRLM  | 0.13                | 0.01        | 8.4    | 0.7         | 0.54   | 0.08        | 21    | 0.98                            | 0.16        | 0.176             |
| 37 | ISKRLMS  | 0.19                | 0.01        | 7.0    | 0.7         | 0.60   | 0.10        | 21    | 0.84                            | 0.27        | 0.212             |

<sup>a</sup> Example of GDO values shown in Fig. S9b&c are shaded in grey. All the parameters are average of the 20 best fragment extract from SVD fit with PALES.

<sup>b</sup>  $Q_{\text{free}}$  is the free quality factor.

<sup>c</sup>  $Da$  is the magnitude of the alignment normalized to  ${}^1D_{\text{NH}}$ .

<sup>d</sup>  $Rh$  is rhombicity of the alignment tensor.

<sup>e</sup>  $N$  is the number of RDCs for the fragment.

<sup>f</sup> GDO is the general degree of order as defined by Equation 2.

<sup>g</sup> backbone root mean square deviation between the 20 best fragments.
